## Evaluation and Treatment of Hypertriglyceridemia: An Endocrine Society Clinical Practice Guideline

Lars Berglund, John D. Brunzell, Anne C. Goldberg, Ira J. Goldberg, Frank Sacks, Mohammad Hassan Murad, and Anton F. H. Stalenhoef

University of California, Davis (L.B.), Sacramento, California 95817; University of Washington (J.D.B.), Seattle, Washington 98195; Washington University School of Medicine (A.C.G.), St. Louis, Missouri 63110; Columbia University (I.J.G.), New York, New York 10027; Harvard School of Public Health (F.S.), Boston, Massachusetts 02115; Mayo Clinic (M.H.M.), Rochester, Minnesota 55905; and Radboud University Nijmegen Medical Centre (A.F.H.S.), 6525 GA Nijmegen, The Netherlands

**Objective:** The aim was to develop clinical practice guidelines on hypertriglyceridemia.

**Participants:** The Task Force included a chair selected by The Endocrine Society Clinical Guidelines Subcommittee (CGS), five additional experts in the field, and a methodologist. The authors received no corporate funding or remuneration.

**Consensus Process:** Consensus was guided by systematic reviews of evidence, e-mail discussion, conference calls, and one in-person meeting. The guidelines were reviewed and approved sequentially by The Endocrine Society's CGS and Clinical Affairs Core Committee, members responding to a web posting, and The Endocrine Society Council. At each stage, the Task Force incorporated changes in response to written comments.

**Conclusions:** The Task Force recommends that the diagnosis of hypertriglyceridemia be based on fasting levels, that mild and moderate hypertriglyceridemia (triglycerides of 150–999 mg/dl) be diagnosed to aid in the evaluation of cardiovascular risk, and that severe and very severe hypertriglyceridemia (triglycerides of > 1000 mg/dl) be considered a risk for pancreatitis. The Task Force also recommends that patients with hypertriglyceridemia be evaluated for secondary causes of hyperlipidemia and that subjects with primary hypertriglyceridemia be evaluated for family history of dyslipidemia and cardiovascular disease. The Task Force recommends that the treatment goal in patients with moderate hypertriglyceridemia be a non-high-density lipoprotein cholesterol level in agreement with National Cholesterol Education Program Adult Treatment Panel guidelines. The initial treatment should be lifestyle therapy; a combination of diet modification and drug therapy may also be considered. In patients with severe or very severe hypertriglyceridemia, a fibrate should be used as a first-line agent. (*J Clin Endocrinol Metab* 97: 2969–2989, 2012)

### Summary of Recommendations

#### 1.0. Diagnosis and definitions

1.1. Severe and very severe hypertriglyceridemia increase the risk for pancreatitis, whereas mild or moderate hypertriglyceridemia may be a risk factor for cardiovascular disease. Therefore, similar to the National Cholesterol Education Program Adult Treatment Panel (NCEP

ATP) III guideline committee's recommendations, we recommend screening adults for hypertriglyceridemia as part of a lipid panel at least every 5 yr (1/⊕⊕⊕⊕).

1.2. We recommend basing the diagnosis of hypertriglyceridemia on fasting triglyceride levels and not on non-fasting triglyceride levels (1/⊕⊕⊕⊕).

1.3. We recommend against the routine measurement of lipoprotein particle heterogeneity in patients with hy-

ISSN Print 0021-972X ISSN Online 1945-7197

Printed in U.S.A.

Copyright © 2012 by The Endocrine Society

doi: 10.1210/jc.2011-3213 Received November 23, 2011. Accepted March 8, 2012.

Abbreviations: apoB, Apolipoprotein B; CI, confidence interval; CVD, cardiovascular disease; DHA, docosahexaenoic acid; EPA, eicosapentaenoic acid; FCHL, familial combined hyperlipidemia; FHA, familial hypoalphalipoproteinemia; FHTG, familial hypertriglyceridemia; HDL, high-density lipoprotein; IDL, intermediate-density lipoprotein; LDL, low-density lipoprotein; Lp(a), lipoprotein(a); LpL, lipoprotein lipase; NEFA, nonesterified fatty acid; VLDL, very low-density lipoprotein.

pertriglyceridemia (1/⊕⊕○○). We suggest that measurement of apolipoprotein B (apoB) or lipoprotein(a) [Lp(a)] levels can be of value, whereas measurement of other apolipoprotein levels has little clinical value (2/⊕⊕○○).

## 2.0. Causes of elevated triglycerides—primary and secondary

2.1. We recommend that individuals found to have any elevation of fasting triglycerides should be evaluated for secondary causes of hyperlipidemia including endocrine conditions and medications. Treatment should be focused on such secondary causes (1/⊕⊕○○).

2.2. We recommend that patients with primary hypertriglyceridemia be assessed for other cardiovascular risk factors, such as central obesity, hypertension, abnormalities of glucose metabolism, and liver dysfunction (1/⊕⊕○○).

2.3. We recommend that clinicians evaluate patients with primary hypertriglyceridemia for family history of dyslipidemia and cardiovascular disease to assess genetic causes and future cardiovascular risk (1/⊕⊕○○).

## 3.0. Management of hypertriglyceridemia

3.1. We recommend lifestyle therapy, including dietary counseling to achieve appropriate diet composition, physical activity, and a program to achieve weight reduction in overweight and obese individuals as the initial treatment of mild-to-moderate hypertriglyceridemia (1/⊕⊕○○).

3.2. For severe and very severe hypertriglyceridemia (>1000 mg/dl), we recommend combining reduction of dietary fat and simple carbohydrate intake with drug treatment to reduce the risk of pancreatitis (1/⊕⊕⊕⊕).

3.3. We recommend that the treatment goal for patients with moderate hypertriglyceridemia be a non-high-density lipoprotein (HDL) cholesterol level in agreement with NCEP ATP guidelines (1/⊕⊕○○).

3.4. We recommend that a fibrate be used as a first-line agent for reduction of triglycerides in patients at risk for triglyceride-induced pancreatitis (1/⊕⊕⊕⊕).

3.5. We suggest that three drug classes (fibrates, niacin, n-3 fatty acids) alone or in combination with statins be considered as treatment options in patients with moderate to severe triglyceride levels (2/⊕⊕○○).

3.6. We recommend that statins not be used as monotherapy for severe or very severe hypertriglyceridemia. However, statins may be useful for the treatment of moderate hypertriglyceridemia when indicated to modify cardiovascular risk (1/⊕⊕○○).

## Method of Development of Evidence-Based Recommendations

The Task Force followed the approach recommended by the Grading of Recommendations, Assessment, Develop-

ment, and Evaluation group (1). A detailed description of this grading scheme has been published (2). In brief, strong recommendations use the phrase “we recommend” and the number 1, and weak recommendations use the phrase “we suggest” and the number 2. The Task Force has confidence that patients who receive care according to the recommendations will derive, on average, more good than harm. Suggestions require more careful consideration of the patient’s circumstances, values, and preferences. *Cross-filled circles* indicate the quality of the evidence: ⊕○○○ denotes very low quality evidence; ⊕⊕○○, low quality; ⊕⊕⊕○, moderate quality; and ⊕⊕⊕⊕, high quality. The quality of the evidence indicates the panel’s confidence that the estimates of risks and benefits associated with the recommended course of action compared with an alternative course of action are correct and unlikely to change importantly with new research.

In developing the recommendations for the management of hypertriglyceridemia, the Task Force acknowledges the observational nature of the available evidence and the dependence on epidemiological studies. Yet, the Task Force made several strong recommendations based on several assumptions of patients’ values and preferences. These values include that lifestyle therapy/modification is preferred over pharmacological interventions and that laboratory screening of hyperlipidemia, which includes screening for hypertriglyceridemia, is acceptable by patients, is feasible, and may be cost-effective if it leads to the prevention of cardiovascular events. The Task Force also considered that the majority of at-risk patients will likely place higher value on preventing clinically important cases of cardiovascular events and pancreatitis than on the burden of long-term pharmacological treatment, which may include side effects, cost, and the need for long-term monitoring.

The Endocrine Society maintains a rigorous conflict of interest review process for the development of clinical practice guidelines. All Task Force members must declare any potential conflicts of interest, which are reviewed before they are approved to serve on the Task Force and periodically during the development of the guideline. The conflict of interest forms are vetted by the Clinical Guidelines Subcommittee (CGS) before the members are approved by the Society’s Council to participate on the guideline Task Force. Participants in the guideline development must include a majority of individuals without conflict of interest in the matter under study. Participants with conflicts of interest may participate in the development of the guideline but they have disclosed all conflicts. The CGS and the Task Force have reviewed all disclosures for this guideline and resolved or managed all identified conflicts of interest.

Conflicts of interest are defined by remuneration in any amount from the commercial interest(s) in the form of grants; research support; consulting fees; salary; ownership interest (e.g., stocks, stock options, or ownership interest excluding diversified mutual funds); honoraria or other payments for participation in speakers' bureaus, advisory boards, or boards of directors; or other financial benefits. Completed forms are available through The Endocrine Society office.

Funding for this guideline was derived solely from The Endocrine Society and thus the Task Force received no funding or remuneration from commercial or other entities.

### 1.0. Diagnosis and definitions

To date, treatment of hyperlipidemia has centered on the management of plasma total and low-density lipoprotein (LDL) cholesterol levels. Although there is robust evidence for an association between LDL cholesterol levels and cardiovascular disease (CVD), there has been more uncertainty regarding the meaning of the association between triglyceride levels and CVD. A high triglyceride level is one of the components of the metabolic syndrome. The latter is associated with risk for CVD, and there is growing support for unadjusted elevated triglyceride levels as an independent CVD risk factor. However, the extent to which elevated triglycerides constitute a direct risk for CVD or more likely represent a marker for other lipoprotein abnormalities associated with CVD risk is unknown and under extensive investigation.

### Recommendation

1.1. Severe and very severe hypertriglyceridemia increase the risk for pancreatitis, whereas mild or moderate hypertriglyceridemia may be a risk factor for cardiovascular disease. Therefore, similar to the NCEP ATP III guideline committee's recommendations, we recommend

screening adults for hypertriglyceridemia as part of a fasting lipid panel at least every 5 yr (1/⊕⊕⊕⊕).

### 1.1. Evidence

Serum triglycerides are routinely measured under fasting conditions to obtain more stable concentrations and to enable the physician to calculate LDL cholesterol levels. In addition, hypertriglyceridemia and postprandial lipemia may affect the measurement of HDL cholesterol and therefore the calculation of non-HDL cholesterol. The NCEP ATP III arbitrarily divided fasting serum triglycerides into four different classes (3) as outlined in Table 1. Classification of serum triglyceride levels greater than 150 mg/dl (1.7 mmol/liter) as elevated is mainly based on large prospective observational studies. However, the exact level at which serum triglycerides start to confer risk or become a marker for CVD is unknown, but it may be even lower than 150 mg/dl (1.7 mmol/liter) (4). Serum triglycerides are higher in men and increase with age in both sexes (5). A serum triglyceride level of 150 mg/dl (1.7 mmol/liter) usually falls below the 75th percentile in various populations, although there have been well-established differences identified between racial and ethnic groups (6–9).

To focus attention on the very high triglyceride levels that are a risk factor for pancreatitis, we have modified the NCEP ATP III triglyceride classification to include an additional classification of very severe hypertriglyceridemia, *i.e.* levels above 2000 mg/dl (Table 1). Severe hypertriglyceridemia, defined as 1000–1999 mg/dl, although not causative of pancreatitis, indicates risk for development of very severe hypertriglyceridemia (10, 11). Notably, the presence of mild and moderate hypertriglyceridemia as a consequence of treated severe

**TABLE 1.** Criteria proposed for clinical diagnosis of elevated triglyceride levels under fasting conditions

|                               | NCEP ATP III (3) |                    |                                  | The Endocrine Society 2010 <sup>a</sup> |                      |
|-------------------------------|------------------|--------------------|----------------------------------|-----------------------------------------|----------------------|
| Normal                        | <150 mg/dl       | <1.7 mmol/liter    | Normal                           | <150 mg/dl                              | <1.7 mmol/liter      |
| Borderline-high triglycerides | 150–199 mg/dl    | 1.7–2.3 mmol/liter | Mild hypertriglyceridemia        | 150–199 mg/dl                           | 1.7–2.3 mmol/liter   |
| High triglycerides            | 200–499 mg/dl    | 2.3–5.6 mmol/liter | Moderate hypertriglyceridemia    | 200–999 mg/dl                           | 2.3–11.2 mmol/liter  |
| Very high triglycerides       | ≥500 mg/dl       | ≥5.6 mmol/liter    | Severe hypertriglyceridemia      | 1000–1999 mg/dl                         | 11.2–22.4 mmol/liter |
|                               |                  |                    | Very severe hypertriglyceridemia | ≥2000 mg/dl                             | ≥22.4 mmol/liter     |

<sup>a</sup> The criteria developed for the present guidelines focus on the ability to assess risk for premature CVD vs. risk for pancreatitis. The designations of *mild* and *moderate* hypertriglyceridemia correspond to the range of levels predominant in risk assessment for premature CVD, and this range includes the vast majority of subjects with hypertriglyceridemia. Severe hypertriglyceridemia carries a susceptibility for intermittent increases in levels above 2000 mg/dl and subsequent risk of pancreatitis; very severe hypertriglyceridemia is indicative of risk for pancreatitis. In addition, these levels suggest different etiologies. Presence of mild or moderate hypertriglyceridemia is commonly due to a dominant underlying cause in each patient, whereas severe or very severe hypertriglyceridemia is more likely due to several contributing factors.

hypertriglyceridemia may represent a cardiovascular risk factor.

Elevated triglyceride levels usually are seen with other metabolic abnormalities associated with increased CVD risk. Factors contributing to elevated serum triglycerides are overweight, physical inactivity, excess alcohol intake, presence of the metabolic syndrome or type 2 diabetes mellitus, as well as certain genetic disorders [familial hypertriglyceridemia (FHTG), familial combined hyperlipidemia (FCHL), and familial dysbetalipoproteinemia] (Table 2). Frequently, hypertriglyceridemia is a result of a combination of genetic factors and other causes of increased secretion or impaired clearance of triglyceride-rich lipoproteins. Based on the NCEP ATP III classification, the prevalence of hypertriglyceridemia is high in adults as well as in youth and adolescents, reflecting a population increase in body weight and obesity during the past several decades. In the National Health and Nutrition Examination Survey (NHANES), 1999–2004, 33% of the nearly 6000 participants (37% men, 30% women) had serum triglycerides of at least 150 mg/dl ( $\geq 1.7$  mmol/liter) (5). In subjects aged 60 yr or older, the percentage was 42% (5). Of subjects with hypertriglyceridemia, about 14% had mild hypertriglyceridemia (150–200 mg/dl), whereas 16% had triglyceride levels of 200–500 mg/dl, and about 2% had levels above 500 mg/dl. Recent surveys of youth and adolescents in the United States (NHANES cycle 1996–2006) and Germany revealed abnormal lipid levels in 20–25% of the participants (12, 13). Lastly, a systematic review and meta-analysis of observational studies commissioned by The Endocrine Society found that hypertriglyceridemia is associated with increased risk of cardiovascular events and pancreatitis (14).

**TABLE 2.** Causes of hypertriglyceridemia

|                                                                                                                                                                                              |
|----------------------------------------------------------------------------------------------------------------------------------------------------------------------------------------------|
| Primary hypertriglyceridemia                                                                                                                                                                 |
| FCHL                                                                                                                                                                                         |
| FHTG                                                                                                                                                                                         |
| Familial dysbetalipoproteinemia                                                                                                                                                              |
| FHA                                                                                                                                                                                          |
| Familial chylomicronemia and related disorders                                                                                                                                               |
| Primary genetic susceptibility                                                                                                                                                               |
| Metabolic syndrome                                                                                                                                                                           |
| Treated type 2 diabetes                                                                                                                                                                      |
| Secondary hypertriglyceridemia                                                                                                                                                               |
| Excess alcohol intake                                                                                                                                                                        |
| Drug-induced (e.g. thiazides, $\beta$ -blockers, estrogens, isotretinoin, corticosteroids, bile acid-binding resins, antiretroviral protease inhibitors, immunosuppressants, antipsychotics) |
| Untreated diabetes mellitus                                                                                                                                                                  |
| Endocrine diseases                                                                                                                                                                           |
| Renal disease                                                                                                                                                                                |
| Liver disease                                                                                                                                                                                |
| Pregnancy                                                                                                                                                                                    |
| Autoimmune disorders                                                                                                                                                                         |

## Recommendation

1.2. We recommend basing the diagnosis of hypertriglyceridemia on fasting triglyceride levels and not on nonfasting triglyceride levels (1/⊕⊕⊕⊕).

## 1.2. Evidence

Prospective studies have indicated that, compared with fasting levels, nonfasting serum triglyceride levels may be a better or similar predictor of CVD events in the general population (15–18). In a number of studies using standardized meals on the association of postprandial lipemia with CVD, greater CVD risk was found to be associated with increased hypertriglyceridemia (19, 20).

Investigators of the Multiple Risk Factor Intervention Trial (MRFIT) concluded that average fasting [187 mg/dl (2.11 mmol/liter)] and nonfasting [284 mg/dl (3.21 mmol/liter)] triglyceride levels were similarly predictive for nonfatal or fatal coronary heart disease with hazard ratios of 1.64 and 1.46, respectively (21). Two recent population-based studies have addressed CVD risk and nonfasting triglyceride levels. The Copenhagen City Heart Study (15) comprised 7587 women and 6394 men, aged 20 to 93 yr, recruited from the general population and followed for a mean of 26 yr. After adjustment for other cardiovascular risk factors (age, total cholesterol, body mass index, hypertension, diabetes, smoking, alcohol consumption, physical inactivity, lipid-lowering therapy, postmenopausal status, and hormone replacement therapy in women), hazard ratios for quintiles of nonfasting triglyceride levels *vs.* the reference level of less than 89 mg/dl ( $<1.0$  mmol/liter) were as follows: between 1.7 and 5.4 for women and 1.4 to 2.4 for men for myocardial infarction; between 1.2 and 2.6 for women and 1.1 to 1.5 for men for ischemic heart disease; and between 1.3 and 3.3 for women and 1.2 to 1.8 for men for total death. All results were significant for trend with increasing triglyceride level. Limitations of this analysis include a small number of subjects with high triglycerides, no adjustment for HDL cholesterol, and a lack of fasting triglyceride levels for comparison.

The Women's Health Study (16) followed 26,509 initially healthy U.S. women older than 45 yr of age for a median of 11.4 yr; testing was done in 20,118 fasting and 6,391 nonfasting participants. The overall rate of cardiovascular events was 3.46/1000 person-years of follow-up. Although fasting triglyceride levels predicted cardiovascular events, the authors did not find an independent association with cardiovascular events after adjusting for potential confounders. In contrast, higher nonfasting triglyceride levels were independently associated with an increased risk of future events with hazard ratios for increasing tertiles of 1.0 (reference group,  $<104$  mg/dl), 1.44 [95% confidence interval (CI), 0.90–2.29; 105–170



mg/dl], and 1.98 (95% CI, 1.21–3.25; >171 mg/dl) ( $P = 0.006$  for trend). Associations were strongest among individuals who had their blood drawn 2 to 4 h after a meal and weakened with increasing time after the participants' last meal. Triglyceride levels and event rates were lower among the healthy U.S. women than those reported in the Copenhagen City Heart Study (15).

Although these studies provide some support for the hypothesis that nonfasting or postprandial lipid levels may be a more potent predictor of CVD risk than fasting levels, the lack of standardization and reference levels impedes a general implementation of nonfasting triglyceride or remnant particle levels (22). Further work is needed on determining the most informative procedure of collecting postprandial lipids and characterization of postprandial effects on triglyceride measurements (23). Thus, at present, the diagnosis of hypertriglyceridemia is suggested to be based on fasting levels where the length of fast is recommended to be 12 h. During this time period, intake of liquids without caloric content is acceptable.

## Recommendation

1.3. We recommend against the routine measurement of lipoprotein particle heterogeneity in patients with hypertriglyceridemia (1/⊕⊕○○). We suggest that measurement of apoB or Lp(a) levels can be of value, whereas measurement of other apolipoprotein levels has little clinical value (2/⊕⊕○○).

## 1.3. Evidence

In most hypertriglyceridemic patients, the distribution of both LDL and HDL sizes is shifted to smaller particles (24). In patients with the metabolic syndrome, treated type 2 diabetes mellitus, or FCHL, the number of small, dense LDL and HDL particles and the apoB levels are increased (25, 26). Hepatic lipase and cholesterol ester transfer protein contribute to the remodeling processes; whether hepatic lipase or cholesterol ester transfer protein has the predominant effect on the size and density of LDL and HDL particles depends on the triglyceride content of very low-density lipoproteins (VLDL) (27, 28). Although the LDL cholesterol level is frequently normal in patients with these conditions, the concentration of LDL particles is generally increased because of the presence of a higher number of cholesterol-poor, small, dense LDL particles. It is not necessary to measure LDL size or density; however, measurement of non-HDL cholesterol and/or apoB levels can indicate the presence of increased numbers of LDL particles (3, 29).

Epidemiological studies vary as to the independent association between large or small LDL and atherosclerotic cardiovascular disease (30). Several prospective studies

suggest that circulating levels of small, dense LDL particles are better predictors of coronary atherosclerosis, carotid atherosclerosis, and response to therapy than are levels of large, buoyant LDL particles (28, 31–33). There is wide agreement, however, that the concentration of LDL, regardless of the particle size, predicts coronary heart disease (3). An increase in small, dense LDL particles is not reflected in the LDL cholesterol concentration. Statins reduce the concentration of all sizes of LDL, and their benefits to CVD are universal across population groups that have large or small LDL (3, 34). Neither LDL size nor the concentration of small, dense LDL particles adds to CVD prediction in multiple variable analysis beyond the standard lipid risk factors, although small LDL particles predict cardiovascular risk in univariate analysis (35–37). Prospective multivariate studies demonstrate that large LDL predicts atherosclerosis and coronary heart disease (35, 38, 39). Several reports also show that measurement of apoB is superior to measurement of LDL or even non-HDL cholesterol as an indicator of global CVD risk (40, 41).

Lp(a) has many properties in common with LDL but contains a unique protein, apolipoprotein(a), which is linked to apoB-100 by a single disulfide bond (42). Recently, interest in Lp(a) has increased because studies over the past decade have confirmed and more robustly demonstrated a risk factor role of Lp(a) for cardiovascular disease (43–46). However, there are limited treatment options to alter its level and a current lack of outcome evidence supporting its use as a specific therapeutic target.

Small HDL in hypertriglyceridemia is associated with hypercatabolism of apolipoprotein A-I (47, 48), and it seems to be related to elevated hepatic lipase activity in central obesity and insulin resistance (49). This property may impair the ability of HDL to take up sufficient cholesterol from peripheral cells. Epidemiological studies have not provided conclusive evidence that measurement of HDL size contributes to risk prediction (36, 50–55). For these reasons, assessment of lipoprotein heterogeneity is not recommended in the assessment of hypertriglyceridemia.

## 2.0. Causes of elevated triglycerides—primary and secondary

### Pathophysiology

Triglycerides are the most dense form of calories and serve as an important source of energy. Dietary triglycerides are assembled in the gut into chylomicrons. Their interaction with lipoprotein lipase (LpL) located on the luminal surface of capillary endothelial cells leads to liberation of free fatty acids from triglyceride; free fatty acids are able to traverse cell membranes. Only 50% of chylo-

micron triglyceride is estimated to be lost in this process, and the remainder of the lipoprotein, called a chylomicron remnant, contains lipids such as cholesteryl esters, retinyl esters, and apoB-48. Several proteins, called apolipoproteins (apo), regulate LpL actions and lipoprotein clearance from the liver. apoC-II is the necessary cofactor for LpL actions. apoC-III blocks the uptake of lipoproteins by receptors in the liver and may impair LpL. apoE is the ligand for hepatic uptake of triglyceride-rich remnants. VLDL particles are produced by the liver, and the VLDL triglyceride content is derived from a variety of substrates including lipoprotein triglyceride, free fatty acids, and *de novo* fatty acids synthesized from carbohydrates. VLDL triglycerides lose free fatty acids by the action of LpL, leading to production of VLDL remnants, also referred to as intermediate-density lipoproteins (IDL), and eventually to conversion to LDL.

The plasma triglyceride level reflects the concentration of the triglyceride-carrying lipoproteins (VLDL and chylomicrons). The concentration of VLDL cholesterol and apoB is at least 10 times higher than the corresponding chylomicron concentration, even after consumption of a large amount of fat (56–59). These lipoproteins contain at least as much cholesterol per particle as does LDL. Although triglyceride itself is not a component of arterial plaque, it is thought that cholesterol within triglyceride-rich particles may contribute to plaque development (60, 61).

Hypertriglyceridemia results from increased triglyceride production, or reduced triglyceride catabolism, or both. The common forms of hypertriglyceridemia emerge as adults get older and become overweight and sedentary and develop insulin resistance. The most common setting of hypertriglyceridemia is that found with metabolic syndrome, FCHL, and type 2 diabetes. The increase in triglyceride production may be due to excess free fatty acids returning to the liver, particularly in the setting of visceral obesity and insulin resistance, and increased *de novo* triglyceride production due to hyperinsulinemia (24, 62, 63). In hypertriglyceridemia, more VLDL particles, as measured by apoB, and larger and more triglyceride- and apoC-III-enriched lipoproteins are found (39, 64, 65). Hepatic insulin resistance may contribute to a high production rate of VLDL because insulin reduces apoB synthesis and VLDL secretion in the liver (66, 67). Although insulin resistance is associated with high triglycerides, VLDL and triglyceride concentrations can be similar in patients with widely divergent insulin sensitivity (68, 69). Acute or chronic elevation of insulin in response to a high carbohydrate diet did not lower serum triglyceride levels in healthy subjects (70, 71). In African-Americans, low triglyceride levels occur in the context of severe

insulin resistance (72). Thus, in an individual patient, the contribution of insulin resistance to overproduction of triglycerides and VLDL may be variable.

Clearance of VLDL from the circulation is reduced in many patients with hypertriglyceridemia (64, 65, 73), in part due to saturation of triglyceride clearance (74). This saturation might occur owing to defective triglyceride hydrolysis by LpL and/or reduced clearance of VLDL and chylomicron remnants by the liver. Defective lipolysis occurs with genetic defects in LpL; defects in apoC-II; defective association of LpL with the vascular wall due to antibodies to heparin or defects in glycosylphosphatidylinositol-anchored high-density lipoprotein-binding protein 1, an LpL-binding protein (75, 76); or defective intracellular LpL processing due to mutated lipase maturation factor 1 (77). Severe hyperchylomicronemia also occurs when a secondary cause of hypertriglyceridemia such as diabetes or pregnancy is superimposed on an underlying genetic defect (78). A number of additional genetic factors influence human triglyceride levels, including mutations in apoC-III, apoE, apoA-V, and angiopoietin-like protein 4. apoE is the main protein that mediates binding of VLDL and chylomicron remnants to hepatic receptors and proteoglycans; it is antagonized by apoC-III. Hypertriglyceridemic VLDL particles are heterogeneous and often have a high apoC-III/apoE ratio, causing reduced clearance and increased conversion to LDL. Recent studies have underscored the difference in metabolism of VLDL subpopulations containing apoC-III, with or without apoE, and how these apolipoproteins are involved to establish hypertriglyceridemia and cause the formation of dense LDL (79).

Moderate hypertriglyceridemia, *i.e.* 200–999 mg/dl, is due to excess circulating VLDL, the principal triglyceride carrier in the circulation. Defective clearance of triglyceride-rich VLDL by LpL can contribute to this condition, and many patients have overproduction of VLDL triglyceride in the liver with an increased secretion (24, 62, 63).

In patients with severe or very severe triglyceride levels ( $\geq 1000$  mg/dl), the LpL removal system is saturated (74). This saturation occurs whether hypertriglyceridemia is primarily due to defective lipolysis or excessive production of endogenous triglyceride, and it leads to reduced catabolism of dietary triglyceride incorporated into chylomicrons. For this reason, there is concern that triglyceride levels above 1000 mg/dl can rapidly increase after a fat-rich meal. Foods that contain potent substrates for triglyceride production such as simple sugars, fructose, and alcohol can substantially increase triglyceride levels in susceptible people (80, 81). Very severe triglyceride levels ( $>2000$  mg/dl) are associated with lipemic serum and risk of pancreatitis in the chylomicronemia syndrome (82).

## Recommendation

2.1. We recommend that individuals found to have any elevation of fasting triglycerides should be evaluated for secondary causes of hyperlipidemia including endocrine conditions and medications. Treatment should be focused on such secondary causes (1/⊕⊕○○).

### 2.1. Evidence

An isolated elevation in triglyceride levels may be caused by a primary disorder of lipid metabolism, *e.g.* FHTG or FCHL. It may also arise secondary to a number of conditions as outlined in Table 2, including a number of medications, a high-carbohydrate diet with intake of simple sugars, or as a component of endocrine and other diseases, inflammation, or some rare genetic diseases. In the setting of common, underlying genetic dyslipidemias, such secondary causes may lead to severe and very severe triglyceride levels and the risk of pancreatitis.

### Endocrine disorders

Patients with untreated diabetes mellitus and insulin deficiency commonly have hypertriglyceridemia; this condition occurs more frequently in type 2 than in type 1 diabetes mellitus. Appropriate diabetes management reduces triglyceride levels. Mild hypertriglyceridemia, typically seen in treated type 2 diabetes, is probably related to the presence of central obesity and insulin resistance (83).

Hypertriglyceridemia related to increased insulin resistance and to decreased activity of both hepatic lipase and LpL occurs in some acromegalic patients (84).

Owing to estrogen-induced stimulation of the secretion of hepatic triglyceride-rich lipoprotein, triglyceride levels increase progressively during pregnancy, with levels in the third trimester increased by 200% or more over levels before pregnancy. In women with underlying disorders of triglyceride metabolism or overproduction, an estrogen-induced increase in triglycerides during pregnancy can result in a risk of pancreatitis with potential fetal loss (85, 86). Oral estrogen in the form of estrogen replacement therapy or oral contraceptives has a triglyceride-increasing effect due to increased hepatic VLDL production. This effect does not occur with transdermal estrogen due to its lesser exposure to the liver (87, 88). Tamoxifen, a selective estrogen receptor modulator, can also increase triglyceride levels. The effect is less pronounced with raloxifene, but that drug can increase levels in women with an underlying propensity to hypertriglyceridemia (89, 90).

Thyroid hormone deficiency is associated with increased LDL cholesterol levels; this increase has been postulated to be due to decreased function of LDL receptors. There can also be an increase in triglyceride levels. Hypo-

thyroidism can lead to the expression of dysbetalipoproteinemia (91–93).

Glucocorticoids have several effects on lipoprotein metabolism including increased cholesterol production from induction of hydroxymethylglutaryl coenzyme A reductase, increased fatty acid synthesis due to increased expression of fatty acid synthase, and decreased clearance of triglyceride-rich lipoproteins (94). Because weight gain and insulin resistance are major effects of both exogenous and endogenous glucocorticoid excess, elevated triglycerides can be seen in Cushing's syndrome as well as during glucocorticoid treatment.

### Rare genetic disorders

Inherited and congenital lipodystrophies are associated with moderate-to-severe hypertriglyceridemia and are characterized by loss of adipose tissue and either autosomal recessive or dominant inheritance (95). The loss of adipose tissue is selective and variable and may be partial or complete. Some forms manifest at birth, whereas others become evident later in life with loss of fat beginning in childhood and puberty (96). Varieties of familial partial lipodystrophy, which are rare autosomal disorders, involve fat loss from the extremities more than the trunk. The Kobberling variety is more common, but the defect is unknown (97). Hypertriglyceridemia is also seen in several types of glycogen storage disease in children (98).

### Other conditions

Acquired lipodystrophy can be seen in patients with HIV infection who are being treated with highly active antiretroviral therapy (99). Other acquired forms of lipodystrophy are seen in patients with autoimmune diseases such as juvenile dermatomyositis. Patients with acquired generalized lipodystrophy lose fat from large areas of the body during childhood and adolescence and often have hepatic steatosis (100).

Hypertriglyceridemia has been reported in multiple myeloma and in autoimmune diseases such as systemic lupus erythematosus involving autoantibodies to LpL, apoC-II, or heparin. Hypertriglyceridemia can also be seen with infections including inflammation and sepsis, apparently due to increased production of VLDL (101). Hypertriglyceridemia in severe stress may be related to possible catecholamine induction of adipose tissue lipolysis and reduced LpL activity (102).

Renal and hepatic disease can be associated with hypertriglyceridemia. Nephrotic syndrome causes increased production of apoB-containing lipoproteins, including VLDL, by the liver (103). Hypertriglyceridemia is common in patients with renal failure and may be related to decreased clearance of triglyceride-rich lipoproteins via

reduced LpL and hepatic lipase activities (104). Acute hepatitis may be associated with increased VLDL production and hypertriglyceridemia (105).

## Drugs

Many drugs raise triglyceride levels. One of the most commonly used is alcohol. Alcohol intake increases hepatic fatty acid synthesis and decreases fatty acid oxidation, with a net effect to stimulate hepatic VLDL triglyceride secretion. The effects of alcohol vary interindividually, tend to be amplified in subjects with underlying lipid disorders, are dose-dependent (106), and may be related to the mode of intake (107).

Antihypertensive drugs with a potential to increase triglyceride levels are thiazide (and furosemide) diuretics and  $\beta$ -adrenergic blocking agents. The hypertriglyceridemic effect of  $\beta$ -adrenergic blocking agents is greater for atenolol, metoprolol, and propranolol than for carvedilol. These effects are most relevant in patients with underlying genetic hypertriglyceridemia (94).

Oral estrogens increase the hepatic secretion of VLDL, leading in turn to an increase in serum triglyceride levels (108). In patients with familial hypertriglyceridemia or LpL deficiency, the use of oral estrogens can provoke severe pancreatitis (109). An increase in hepatic VLDL and apoC-III production and perhaps a decrease in LpL leading to increased triglyceride levels are also seen during use of retinoids such as isotretinoin and the anticancer drug bexarotene (110–112).

Bile acid sequestrants (cholestyramine, colestipol, colesevelam) can worsen hypertriglyceridemia and are contraindicated in patients with severe hypertriglyceridemia ( $>1000$  mg/dl) and in patients with dysbetalipoproteinemia. Patients with normal baseline triglyceride levels experience minimal triglyceride increases with bile acid sequestrant therapy, but those with moderate hypertriglyceridemia (triglycerides  $> 200$  mg/dl) may experience substantial further elevation (113).

Dyslipidemia is a frequent complication of antiretroviral therapy for HIV infection. In particular, the protease inhibitors ritonavir and lopinavir can increase plasma triglyceride levels (114).

Immunosuppressants such as sirolimus also increase triglyceride levels (115).

Certain second-generation antipsychotic medications such as clozapine, olanzapine, risperidone, and quetiapine can be associated with hypertriglyceridemia, but this effect has not been seen for aripiprazole or ziprasidone. Those that are associated with weight gain, insulin resistance, and worsening of the metabolic syndrome are particularly important contributors to secondary hyperlipidemia. Among selective serotonin reuptake inhibitors, sertraline may raise triglycerides (116).

## Recommendation

2.2. We recommend that patients with primary hypertriglyceridemia be assessed for other cardiovascular risk factors, such as central obesity, hypertension, abnormalities of glucose metabolism, and liver dysfunction (1/⊕⊕○○).

## 2.2. Evidence

Elevated triglycerides can occur in the absence or presence of other lipid or lipoprotein disturbances. Patients with elevations in the levels of both total plasma cholesterol and triglyceride can be divided into three categories. In the first category, VLDL and/or LDL cholesterol levels are elevated, as in FCHL. In the second category, VLDL and chylomicron remnant cholesterol are elevated, as in familial dysbetalipoproteinemia. The third category consists of patients with severe and very severe hypertriglyceridemia in whom the increase in plasma cholesterol is a result of increased VLDL and chylomicron cholesterol.

## Familial combined hyperlipidemia

The lipid phenotype in FCHL varies from isolated hypertriglyceridemia to isolated hypercholesterolemia within families and in single individuals, suggesting that the variation in the lipid phenotype is affected by environmental factors (78). In some subgroups, such as those with half-normal LpL activity, the lipoprotein phenotype seems to be more stable as hypertriglyceridemia and less stable as hypercholesterolemia. In patients with FCHL, increases in triglycerides and LDL cholesterol are often found, whereas elevated apoB levels and small, dense LDL particles are always seen (25). It has been suggested that measurement of apoB and non-HDL cholesterol levels, in addition to assessment of LDL and HDL cholesterol levels, will serve as a basis by which to identify these FCHL individuals at risk for premature CVD (117). In addition, patients with FCHL frequently have nonlipid cardiovascular risk factors (*i.e.* central obesity, hypertension, insulin resistance, and impaired glucose tolerance). The prevalence of FCHL in the population is estimated to be 1–2% and in CVD populations to be at least 10% (78). It should be underscored that regardless of the etiology, the combination of hypertriglyceridemia and elevated LDL cholesterol, with small, dense LDL particles, appears to increase the risk associated with elevated LDL cholesterol alone.

## Familial hypertriglyceridemia

FHTG is a common inherited disorder, thought to be autosomal dominant, which affects about 1% of the population. It is characterized by an increased triglyceride synthesis, which results in very large triglyceride-enriched



VLDL particles, secreted in normal numbers. Affected people have elevated VLDL levels, but low levels of LDL and HDL cholesterol, and are generally asymptomatic unless very severe hypertriglyceridemia develops. FHTG does not appear to be associated with an increased risk of premature CVD (118). However, subjects are at increased risk for the development of the chylomicronemia syndrome and pancreatitis when secondary forms of hypertriglyceridemia are present, such as untreated diabetes or use of triglyceride-raising drugs. A diagnosis is made by family history and examination of fasting lipoprotein profiles of the patient and relatives. The triglyceride level ranges from about 250 to 1000 mg/dl in approximately one half of first-degree relatives. A strong family history of premature CVD usually is lacking, and elevated LDL cholesterol levels are not present.

It is important to distinguish FHTG, which seems to confer no risk of premature CVD, from FCHL, which is associated with a high incidence of premature CVD (78). It is often difficult to distinguish these disorders when FCHL is associated with hypertriglyceridemia. Concomitant increased apoB or LDL cholesterol concentration indicates FCHL. FCHL is also strongly suggested by a positive personal or family history of premature atherosclerosis with hypertriglyceridemia (78).

### **Chylomicronemia syndrome**

Chylomicronemia is associated with pancreatitis, but the mechanism is unclear. Pancreatitis may result from the release of excess fatty acids and lysolecithin from chylomicrons, exceeding the binding capacity of albumin in pancreatic capillaries. The chylomicronemia syndrome occasionally occurs with a genetic defect in the LpL-related triglyceride clearance system. More commonly, chylomicronemia is caused by the coexistence of a common genetic form of hypertriglyceridemia combined with an acquired disorder of plasma triglyceride metabolism, the most common being untreated diabetes (82). Another condition that may be implicated is the use of drugs that raise triglyceride levels.

The chylomicronemia syndrome is associated with abdominal pain, eruptive xanthomas on the buttocks and the extensor surfaces of the upper limb, transient memory loss, and the risk for artifactual alterations in laboratory analyses. If uncorrected, the chylomicronemia syndrome may result in acute, recurrent pancreatitis. The risk of pancreatitis markedly increases with very severe triglyceride levels above 2000 mg/dl (82), but it can be prevented by maintaining triglyceride levels below 1000 mg/dl. Severe hypertriglyceridemia can present in childhood as a result of LpL deficiency or, extremely rarely, as apoC-II, apoA-V, or glycosylphosphatidylinositol-anchored high-

density lipoprotein-binding protein 1 deficiency. These patients are at risk for acute, recurrent pancreatitis with severe hypertriglyceridemia, and they must be treated with moderate to severe dietary fat restriction to reduce plasma triglyceride levels (78). In patients with severe and very severe triglyceride elevations, the increase in total plasma cholesterol is a result of the cholesterol in VLDL and chylomicrons.

### **Familial hypoalphalipoproteinemia with high triglycerides**

In 1992, Genest *et al.* (119, 120) proposed that familial hypoalphalipoproteinemia (FHA), a disorder with elevated triglyceride and low HDL cholesterol, was a common genetic dyslipidemia associated with premature CVD. Many, if not most, patients with hypertriglyceridemia have a concomitant reduction in HDL cholesterol levels. It is not known whether FHA is a discrete genetic disorder. Low HDL cholesterol is commonly seen with premature CVD and may be related, in part, to mutations in proteins of HDL metabolism. However, mutations in these candidate genes are rare and account for few FHA cases. FHA is often confused with FHTG, and more studies are needed to characterize this condition.

Almost all forms of severe genetic HDL deficiency are associated with mild-to-moderate hypertriglyceridemia. These include Tangier's disease, apoA-I deficiency, and lecithin cholesterol acyl transferase deficiency.

### **Dysbetalipoproteinemia**

Dysbetalipoproteinemia, also called type III hyperlipoproteinemia or remnant removal disease, is caused in part by a mutation in the APOE gene, resulting in impairment in the hepatic uptake of apoE-containing lipoproteins and reduction in the conversion of VLDL and IDL to LDL particles (121). In the absence of additional genetic, hormonal, or environmental factors, remnants do not accumulate to a degree sufficient to cause hyperlipidemia in fasting blood. Dysbetalipoproteinemia results when an apoE defect (almost always the E2/E2 genotype) occurs in conjunction with a second genetic or acquired defect that causes either overproduction of VLDL (such as FCHL) or a reduction in LDL receptor activity (such as occurs in heterozygous FH or hypothyroidism). Other rare apoE variants such as apoE3-Leiden and apoE2(Lys146→Gln) can also cause dysbetalipoproteinemia (122, 123). Patients with dysbetalipoproteinemia have elevations in both cholesterol and triglyceride levels (124). They are likely to develop premature CVD and are at increased risk for peripheral vascular disease. Clinical dyslipidemia usually does not develop before adulthood in men or before menopause in women. Palmar xanthomas, orange lipid

deposits in the palmar creases, are pathognomonic, but are not always present. Tuberoeruptive xanthomas are occasionally found at pressure sites on the elbows, buttocks, and knees. The presence of dysbetalipoproteinemia should be suspected in a person with elevated total cholesterol and triglyceride levels that range from 300 to 1000 mg/dl and are roughly equal. VLDL particles are cholesterol-enriched, which can be determined by isolation of VLDL by ultracentrifugation. It can be useful to confirm the diagnosis by demonstrating the presence of the E2/E2 genotype.

### Metabolic syndrome

Hypertriglyceridemia is one of the components of the metabolic syndrome, a constellation of metabolic risk factors including a central distribution of adiposity or visceral obesity, insulin resistance, impaired glucose tolerance, hypertension, and high triglycerides and/or low HDL-C, associated with an atherogenic, procoagulant, and proinflammatory state (125). Although criteria for defining the metabolic syndrome have differed among health organizations, recently a harmonized definition has been agreed to by leading cardiovascular and diabetes organizations including the National Heart, Lung, and Blood Institute, the International Diabetes Federation, and the American Heart Association (126). The five components that form the criteria for defining the metabolic syndrome are triglycerides above 150 mg/dl; HDL-C below 40 mg/dl in men or below 50 mg/dl in women; blood glucose above 100 mg/dl; blood pressure above 130 mm Hg systolic or above 85 mm Hg diastolic; and waist circumference greater than 102 cm in men or greater than 88 cm in women. A lower criterion for waist circumference is recommended for Asian populations. Three of these five criteria are needed to make the diagnosis of metabolic syndrome. Genetic and environmental factors appear to affect the distribution of these variables in both normal individuals and those with the metabolic syndrome. Type 2 diabetes mellitus, polycystic ovary syndrome, and FCHL may account for at least 40–50% of premature coronary artery disease in some populations with metabolic syndrome, and they need to be considered in assessing the risk of CVD in patients who have the metabolic syndrome (26).

Although the association of central obesity and insulin resistance with dyslipidemia is well established, the underlying mechanisms remain unclear. An increase in the level of portal vein long-chain nonesterified fatty acids (NEFA, or free fatty acids) has been suggested as an underlying factor. Increased visceral fat is associated with insulin resistance, hyperinsulinemia, low plasma adiponectin levels, and elevations in plasma NEFA levels (127). An increase in portal NEFA would potentially in-

hibit apoB-100 from undergoing degradation in the hepatic proteasome and would increase the likelihood of secretion of triglyceride-containing lipoproteins, contributing to increased triglyceride levels and an increased number of VLDL and LDL particles seen in patients with insulin resistance (24). Importantly, in normal, randomly selected healthy populations, isolated visceral obesity and insulin resistance were associated with only a slight increase in triglyceride levels and only a slight decrease in HDL cholesterol levels (127). Increased waist circumference and plasma triglyceride levels together confer greater CVD risk in these patients (128).

### Ectopic fat accumulation

Excess tissue triglyceride accumulation results from increased uptake of circulating triglycerides (*e.g.* in LpL deficiency), greater production of triglyceride from carbohydrates or free fatty acids (*e.g.* in type 2 diabetes mellitus), or reduced utilization or secretion of triglyceride (*e.g.* in familial hypobetalipoproteinemia). Excess triglyceride stores are found in livers of patients with nonalcoholic fatty liver disease (129). Hepatic steatosis is often associated with increased intraabdominal fat and fat accumulation in other tissues such as skeletal muscle, heart, and perhaps pancreas, and may lead to insulin resistance associated with type 2 diabetes and metabolic syndrome (130). Cellular and animal experiments suggest that signaling lipids other than triglyceride, such as ceramides or diacylglycerols, may be pathological (131). Because hypertriglyceridemia, increased intraabdominal fat, and nonalcoholic fatty liver disease occur with insulin resistance and excess caloric intake, a cause-and-effect relationship is difficult to conclude. Recent human genetic studies have found several predisposing factors that might provide novel insights. At this time, routine assessment of hepatic fat content or intraabdominal fat content in hypertriglyceridemic patients is not indicated. An increase in hepatic fat content is associated with an increase in aminotransferase activities, in particular, alanine aminotransferase.

### Recommendation

2.3. We recommend that clinicians evaluate patients with primary hypertriglyceridemia for family history of dyslipidemia and cardiovascular disease to assess genetic causes and future cardiovascular risk (1/⊕⊕○○).

### 2.3. Evidence

Whether serum triglycerides are causally related to atherosclerosis remains to be elucidated, as does the exact mechanism by which they may promote vascular disease. Factors contributing to this uncertainty are the complex metabolism of triglyceride-rich lipoproteins and the fact

that abnormal triglyceride concentrations are seen frequently in conditions associated with increased CVD risk, such as type 2 diabetes mellitus, the metabolic syndrome, and the familial forms of hypertriglyceridemia, in the presence of low HDL-cholesterol levels and small dense LDL particles. An elevated serum triglyceride level might in some cases be a marker for CVD rather than a causal factor.

Several meta-analyses from studies performed in the general population have shown a modest but independent effect of triglycerides on CVD. A meta-analysis of Western population-based prospective studies, including 46,413 men and 10,864 women, showed an overall relative risk for CVD of 1.32 for men and 1.76 for women per 1 mmol/liter (88.5 mg/dl) increase of triglycerides (132). Adjustment for HDL cholesterol and other cardiovascular risk factors attenuated the relative risk attributed to triglycerides, although they remained significant (1.14 and 1.37, respectively) (132). More recently, a report of two nested case-control comparisons from population-based cohorts [the Reykjavik study and the European Prospective Investigation of Cancer (EPIC)-Norfolk study] comprised 44,237 Western middle-age men and women of predominantly European ancestry and a total of 3,582 cases of coronary heart disease (133). In the Reykjavik study, fasting triglyceride levels in cases were  $105 \pm 70$  mg/dl ( $1.19 \pm 0.79$  mmol/liter) *vs.*  $91 \pm 55$  mg/dl ( $1.03 \pm 0.62$  mmol/liter) in controls. The corresponding levels in the EPIC-Norfolk study were  $195 \pm 107$  mg/dl ( $2.20 \pm 1.21$  mmol/liter) and  $168 \pm 104$  mg/dl ( $1.90 \pm 1.17$  mmol/liter), respectively. Comparing individuals in the top *vs.* the bottom tertile, the adjusted odds ratio for CVD was 1.76 (95% CI, 1.39–2.21) in the Reykjavik study and 1.57 (95% CI, 1.10–2.24) in the EPIC-Norfolk study. Adjustment for HDL cholesterol attenuated the effect to an odds ratio of 1.31 (95% CI, 1.06–1.62) in the EPIC-Norfolk study. In addition, an updated meta-analysis of prospective studies in Western populations, providing information in aggregate from more than 10,000 coronary heart disease cases involving more than 260,000 participants, reported an adjusted odds ratio of 1.72 (95% CI, 1.56–1.90) comparing the top and bottom triglyceride tertiles (133). These results are similar to those reported by another nonoverlapping meta-analysis based on Asian and Pacific populations, although the absolute risk in these populations was much lower (134). This latter meta-analysis calculated a relative risk for coronary heart disease, adjusted for several established risk factors, of 1.80 (95% CI, 1.49–2.19), comparing subjects in the top with those in the bottom quintile of triglyceride levels.

A third large prospective cohort study, the MELANY study, was conducted in 13,953 healthy male soldiers

(aged 26 to 45 yr) in Israel (135). After multivariate adjustment (including age, body mass index, HDL cholesterol, physical activity, fasting glucose, mean arterial blood pressure, smoking), men in the top quintile of triglyceride levels had a hazard ratio for coronary heart disease of 4.05 (95% CI, 2.68–8.61) compared with the lowest quintile ( $P = 0.001$  for trend) (135). Beyond fasting triglyceride levels, the change in triglyceride levels strongly predicted incident coronary heart disease (135). Finally, the Emerging Risk Factors Collaboration (ERFC) collected 112 prospective studies of cardiovascular risk factors, involving a total of 1.2 million participants in a central database with individual data records (136). This group recently assessed the association of major lipids and apolipoproteins with vascular risk based on 68 of these prospective studies, involving more than 300,000 participants with information on lipid profile and conventional risk factors (9). The hazard ratio for coronary heart disease with triglycerides was 1.37 (95% CI, 1.31–1.42) after adjustment for nonlipid factors, but was reduced to 0.99 (95% CI, 0.94–1.05) after adjustment for HDL cholesterol and non-HDL cholesterol (9).

There may be a nonlinear relationship between triglyceride levels and CVD (patients with the chylomicronemia syndrome are not always characterized by premature CVD) (82). It could be due to enrichment of these populations with patients with FHTG who are not at increased risk for premature CVD. Very large triglyceride-rich lipoproteins, perhaps equivalent to unmetabolized chylomicrons, are not atherogenic if they are too large to penetrate into the arterial wall (60, 137). Although there are a number of severely hypertriglyceridemic animals, especially genetically modified mice, these animals develop only early-stage lesions (138, 139). In contrast, there is no doubt that metabolic products of triglyceride-rich lipoproteins are atherogenic (140–142). Zilversmit (143) first postulated that atherosclerosis developed in part due to arterial infiltration of chylomicron remnants locally produced by arterial wall LpL. A variety of animal models produced using dietary or genetic manipulations have confirmed that chylomicron remnants are atherogenic (139, 144). Remnants have been identified within human atherosclerosis plaques (145). Unlike VLDL and LDL that contain full-length apoB-100, chylomicrons contain a truncated apoB, apoB-48. apoB-48 lipoproteins are clearly atherogenic as shown in a mouse model constructed with apoB-48 as the only type of apoB in VLDL and LDL (146).

Although it is cholesterol and not triglyceride that is the pathological signature of atherosclerosis and that accumulates both intracellularly in foam cells and extracellularly within the plaque, lipolysis of triglyceride-rich lipoproteins also produces fatty acids, lysolecithin, and other

reactive lipids. *In vitro* studies have implicated these lipids (and in some experiments lipolysis of triglyceride) in inflammation (147), expression of adhesion molecules (148), and promotion of coagulation (149). In addition, *ex vivo* studies have shown that lipolysis leads to increased permeability of blood vessels (150), which may allow greater infiltration of LDL. Nonetheless, because of the lack of clear human data showing that reductions of triglyceride reduce CVD, the Task Force views hypertriglyceridemia as a marker for risk in some individuals.

### 3.0. Management of hypertriglyceridemia

#### Recommendation

3.1. We recommend lifestyle therapy, including dietary counseling to achieve appropriate diet composition, physical activity, and a program to achieve weight reduction in overweight and obese individuals as the initial treatment of mild-to-moderate hypertriglyceridemia (1/⊕⊕○○).

#### 3.1. Evidence

##### Diet

Much of the increase in serum triglycerides that occurs in adult life is caused by weight gain, lack of exercise, and a diet rich in simple carbohydrates and sugar-sweetened beverages. This may also underlie hypertriglyceridemic situations in younger ages (151). As regards diet quality, in the weight-stable condition, even in overweight or obese people, reduced carbohydrate intake and increased fat intake lower fasting triglycerides. There is a quantitative linear relation between replacement of dietary carbohydrate with fat and reduction in serum triglycerides (152). Saturated, monounsaturated, and n-6 polyunsaturated fatty acids all lower serum triglycerides when they replace carbohydrate, with no clear difference between fatty acid classes in this action. However, diet affects other cardiovascular risk factors beyond triglycerides, and such effects need to be taken into account. Thus, there is a large body of evidence clearly indicating that both dietary saturated fat and trans fatty acids increase LDL cholesterol levels. Replacing these atherogenic fatty acids with monounsaturated or polyunsaturated fat lowers LDL cholesterol; n-6 polyunsaturated fats have a stronger LDL-lowering effect than monounsaturated fats (152). n-3 Polyunsaturated fat lowers serum triglycerides uniquely among the fatty acids, as discussed in the section on drug treatment below.

The type of carbohydrate may affect serum triglycerides. Fructose as contained in sweetened beverages may have stronger triglyceride-raising effects than glucose. This point of view, that fructose as a component of sugar-sweetened beverages, is more detrimental than sucrose or glucose is controversial, however, and more information is needed

from randomized comparative trials. Nonetheless, it is recommended that reduced intake of sugar-sweetened beverages, whether composed mainly of high-fructose corn syrup or sucrose, is an important part of lowering serum triglycerides (151). Some carbohydrate-rich foods such as potatoes, white bread, and rice increase blood glucose more quickly and to a higher concentration than other carbohydrate-rich foods such as apples, legumes, nuts, pasta, and densely-baked whole grain breads. This difference is expressed by the glycemic index, which is the rise in blood glucose of 50 g of carbohydrate in a specific food compared with either 50 g glucose or white bread (153). The glycemic index may correlate with the extent of rise of serum triglyceride after eating carbohydrate-rich foods (154).

There has been much less attention paid to the effects of dietary protein on serum triglycerides. Low-carbohydrate diets are mainly high in fat, but protein content usually increases as well. Thus, the triglyceride-lowering effects of low-carbohydrate diets may be partly caused by protein. The OmniHeart study compared the effects of healthful dietary patterns based on the DASH diet that lowered blood pressure and LDL cholesterol. These dietary patterns all emphasize fruits, vegetables, and low-fat dairy products; include whole grains, poultry, fish, and nuts; use unsaturated vegetable oils; and contain smaller amounts of red meat, sweets, and sugar-containing beverages than typical diets in the United States (155, 156). Compared with a diet that emphasized carbohydrate, a similar diet that emphasized protein decreased triglyceride levels further, and this decrease was about twice the effect of a diet that emphasized unsaturated fat (155).

African-Americans have lower serum triglyceride levels than other racial or ethnic groups. The OmniHeart study, in which 50% of the population was African-American, found that diet modification had less effect on triglyceride levels in this ethnic group than in a Caucasian population when matching baseline triglyceride levels (157). Further studies addressing variability across population subgroups are needed.

##### Exercise

It has been reported that exercise the day before ingestion of a high-fat meal is associated with a marked dampening of the postprandial triglyceride increase. The mechanisms for this are not clear, and the exercise benefits are relatively short-lived. The minimum exercise required to reduce a postprandial triglyceride increase has not been determined, but a period of 30–60 min of intermittent aerobic exercise or mild resistance exercise has been shown to be effective in lowering plasma and VLDL triglycerides. These findings suggest a benefit from an active lifestyle that does not require intense or prolonged exercise



(158, 159). A recent meta-analysis comparing aerobic exercise programs showed favorable effects only for high-intensity programs. The most frequently observed alteration was an increase in the HDL cholesterol, whereas reductions in triglycerides, total cholesterol, and LDL cholesterol appeared less often (160). Furthermore, in a recent large, community-based study, a combination of aerobic and resistance exercise was associated with lower triglyceride levels in men as compared with aerobic exercise alone (161).

Treatment of excess weight is critical to reduce triglyceride levels. The macronutrient composition of a weight-loss diet is considerably less important for lowering triglycerides than the amount of weight lost. Two recent large-scale clinical trials of 2-yr duration did not find differences in effects on triglyceride levels between low-fat, high-carbohydrate diets and low-carbohydrate diets (162, 163). Many studies have shown that ongoing counseling by dietitians and behavioral therapists, as well as support from peers, is important to most people who are successful in losing weight and maintaining weight loss.

### Recommendation

3.2. For severe and very severe hypertriglyceridemia (>1000 mg/dl), we recommend combining reduction of dietary fat and simple carbohydrate intake with drug treatment to reduce the risk of pancreatitis (1/⊕⊕⊕⊕).

### 3.2. Evidence

Determination and treatment of underlying causes of very severe hypertriglyceridemia should be considered first. Restriction of both saturated and unsaturated dietary fat, particularly at initiation of therapy and in LpL deficiency, assists in lowering triglyceride acutely. Design of the dietary intervention may benefit from input from nutrition specialists. Regain of weight loss might exacerbate pancreatitis risk (82).

### Recommendation

3.3. We recommend that the treatment goal for patients with moderate hypertriglyceridemia be a non-HDL cholesterol level in agreement with NCEP ATP guidelines (1/⊕⊕⊕⊕).

### 3.3. Evidence

Non-HDL cholesterol (total serum cholesterol minus HDL cholesterol) reflects the amount of cholesterol in all atherogenic lipoprotein particles. In the case of an increase in VLDL, commonly seen in hypertriglyceridemia, measurement of LDL cholesterol alone would underestimate the risk associated with atherogenic lipoproteins. Therefore, measurement of non-HDL cholesterol is recom-

mended in subjects with hypertriglyceridemia both for risk stratification and as a secondary target for therapy (3, 164). Alternatively, the blood level of atherogenic lipoprotein particles can be assessed by measuring the concentration of apoB. Not unexpectedly, there is a good correlation between apoB and non-HDL cholesterol because one apoB molecule is present on the surface of each chylomicron, VLDL, IDL, LDL, and Lp(a) particle and resides with the particle during its metabolism in the plasma compartment. Therefore, the apoB concentration reflects the concentration of atherogenic lipoprotein particles. Because measurement of apoB is helpful in the differentiation of FCHL from FHTG, apoB levels may be measured during an initial evaluation of a hypertriglyceridemic patient. Non-HDL cholesterol can then be followed as the therapeutic target.

### Recommendations

3.4. We recommend that a fibrate be used as a first-line agent for reduction of triglycerides in patients at risk for triglyceride-induced pancreatitis (1/⊕⊕⊕⊕).

3.5. We suggest that three drug classes (fibrates, niacin, n-3 fatty acids) alone or in combination with statins be considered as treatment options in patients with moderate to severe triglyceride levels (2/⊕⊕⊕⊕).

### 3.4–3.5. Evidence

Three drug classes are clinically available for treatment of hypertriglyceridemia—fibrates, niacin, and n-3 fatty acids. Each of these classes has limitations. There is inconsistency in the evidence base for cardiovascular risk reduction using fibrates, the use of niacin is associated with significant side effects, and there are limited data on the use of n-3 fatty acids to reduce cardiovascular risk. It is uncertain whether we should treat moderate hypertriglyceridemia or other lipoprotein abnormalities associated with this degree of hypertriglyceridemia. If the primary goal is to lower triglyceride levels, fibrates and perhaps n-3 fatty acids are best. If the primary goal is to modify the size and density of LDL and HDL particles, niacin is best.

### Fibrates

Fibrates should be strongly considered in patients with severe and very severe hypertriglyceridemia and should be considered in patients with moderate hypertriglyceridemia. Fibrates decrease triglyceride levels by 30–50% and sometimes increase HDL cholesterol (165–168). In patients with high triglyceride levels, LDL cholesterol levels may increase, whereas in mild hypertriglyceridemia, LDL cholesterol levels may decrease. In patients with triglyceride-induced pancreatitis, treatment of underlying causes

and concomitant fibrate therapy to maintain triglyceride levels below 2000 mg/dl is beneficial to prevent recurrent disease (82). Due to a large excursion of triglyceride levels in the setting of very severe hypertriglyceridemia, a treatment goal of less than 1000 mg/dl is recommended. Below this level, the main effort should be directed toward prevention of premature atherosclerosis. We do not recommend the use of heparin infusions or plasmapheresis in the treatment of very severe hypertriglyceridemia with pancreatitis. The treatment of underlying causes including dietary fat restriction and use of long-term fibrate therapy should suffice (82).

Studies to date have not demonstrated an overall benefit of fibrates for reduction of cardiovascular or total mortality (165–169). An *a priori* analysis demonstrated that a decrease in triglyceride and elevation of HDL cholesterol levels was associated with a decrease in primary events, while at the same time, there was an increase in death in females (169). *Post hoc* subgroup analyses of all of these trials show that the use of fibrates in patients with moderate hypertriglyceridemia results in a decrease in composite cardiovascular events, but not a decrease in mortality (170–172). However, these studies also indicate that treatment of patients with triglycerides below 200 mg/dl does not confer benefit.

Fibrates increase fatty acid oxidation, increase LpL synthesis, and reduce expression of apoC-III, all of which decrease VLDL triglyceride production and increase LpL-mediated catabolism of triglyceride-rich lipoproteins (170). Side effects include gastrointestinal discomfort and possibly an increased incidence of cholesterol gallstones. Fibrates are contraindicated in patients with liver and gall bladder disease. Fibric acid derivatives should be used with great caution in the setting of renal insufficiency because the drugs are excreted in the urine and may reversibly increase serum creatinine levels—especially fenofibrate, although the significance of this effect is unknown. Fenofibrate, which does not interfere with statin metabolism and has a lower risk of causing myopathy, is the preferred fibrate to use in combination with a statin. Due to effects on protein binding, there is a potential interaction with warfarin requiring careful monitoring. Gemfibrozil can be considered in very severe hypertriglyceridemia beginning in the second trimester in pregnant women who are at risk of pancreatitis (86).

### Niacin

Clinical trials using niacin, alone or in combination with other lipid medications, have shown benefits in decreasing cardiovascular event rates and atherosclerosis (173–176). However, the recently concluded AIM-HIGH study did not report any further benefits with regard to

cardiovascular events when niacin was added to a statin in patients with median triglyceride level of about 160 mg/dl in the mild hypertriglyceridemia range and average LDL cholesterol levels below 80 mg/dl (177). At doses of 500–2000 mg/d, niacin lowers triglycerides by 10–30%, increases HDL cholesterol by 10–40%, and lowers LDL cholesterol by 5–20%. Although higher doses of immediate-release (crystalline) niacin have been used, the maximum dose of the prescription extended-release formulation is 2000 mg/d; doses this high are reached by increasing the dose slowly over time. Niacin contributes to the release of prostaglandin D2 from cells in the skin leading to vasodilatation. The most common side effect is cutaneous flushing, which is most significant with the first few doses. It occurs 15 to 60 min after ingestion and typically lasts 15 to 30 min. Ingestion after a meal and administration of uncoated aspirin before the meal minimizes flushing. The most serious complication of niacin therapy is hepatotoxicity (which is dose dependent), and therapy should be accompanied by monitoring of liver function tests (178). Other side effects of niacin therapy include impairment or worsening of glucose tolerance and hyperuricemia. Niacin can be used safely in patients with glucose intolerance and can be considered in diabetic patients on oral medications or insulin who have moderate to good glycemic control but could cause conversion of borderline glucose intolerance to meet diabetes criteria in some patients. Niacin can increase blood levels of uric acid by blocking its excretion and can precipitate or worsen gout unless the patient is treated with allopurinol. Niacin is contraindicated in patients with active peptic ulcer disease.

### n-3 Fatty acids

The long-chain marine omega-3 fatty acids [eicosapentaenoic acid, C20:5n-3 (EPA) and docosahexaenoic acid, C22:6n-3 (DHA)] lower fasting and postprandial triglyceride levels in a dose-dependent fashion. Approximately 3 to 4 g/d of EPA plus DHA are necessary to reduce hypertriglyceridemia by 20–50% (179). HDL cholesterol is mildly increased by about 5%. With reductions of triglyceride levels, there can be increased levels of LDL cholesterol due to increased conversion of VLDL to LDL. To date, no studies using high-dose n-3 fatty acids in hypertriglyceridemia patients have shown a beneficial cardiovascular outcome. EPA added to statin therapy in subjects with cholesterol levels above 250 mg/dl in an open-label study resulted in a 19% relative reduction in major coronary events (180). Omega-3 fatty acids (*e.g.* Lovaza) may be considered for treatment of triglyceride levels above 1000 mg/dl. Over-the-counter preparations of omega-3 fatty acids have variable quantities of EPA and DHA ranging from 20–50%, depending on products. The nutrition

labels must be studied to calculate the number of capsules required to obtain a dose of 3–5 g of n-3 fatty acids. Omega-3 acid ethyl esters are available by prescription in capsules that contain 80% EPA and DHA. Thus, a dose of four capsules is needed to lower triglycerides by 30–50% (181). Side effects with large doses of omega-3 fatty acids include fishy taste and burping. Beyond an impact of omega-3 fatty acid supplements on triglyceride levels, intake of diets rich in n-3 fatty acids have resulted in positive outcomes with regard to cardiovascular disease (182–184).

### Recommendation

3.6. We recommend that statins not be used as monotherapy for severe or very severe hypertriglyceridemia. However, statins may be useful for the treatment of moderate hypertriglyceridemia when indicated to modify cardiovascular risk (1/⊕⊕○○).

### 3.6. Evidence

Hydroxymethylglutaryl coenzyme A reductase inhibitors, or statins, have a modest triglyceride-lowering effect, typically about 10–15%, which is dose-dependent. High doses of statins that have strong efficacy, such as atorvastatin 80 mg or rosuvastatin 40 mg, can lower plasma triglyceride by 25–30%. Statin monotherapy should not be first-line therapy to reduce triglyceride levels in patients with severe or very severe hypertriglyceridemia (>1000 mg/dl). Addition of statins can be considered to reduce cardiovascular risk in patients with mild-to-moderate hypertriglyceridemia (>150 mg/dl and <1000 mg/dl) and elevated non-HDL cholesterol. Side effects of statins occur in about 5–10% of patients. Muscle symptoms ranging from leg cramps to aching to weakness occur in about 10% of patients, whereas rhabdomyolysis is rare (185). Conditions predisposing to severe myopathy include advanced age, renal failure, polypharmacy, and acute illness.

### Combination therapy and other drugs

Because the four drug classes described above (fibrates, niacin, n-3 fatty acids, and statins) have different underlying mechanisms in reducing triglyceride levels, as well as correcting other associated dyslipidemias, there is a considerable potential for use of drug combinations based on complementary mechanisms (169, 186). Examples include a combination of niacin and statins or fibrates and statins. Attention needs to be paid to potential drug-drug interaction. To minimize such risks, combination treatment should be initiated carefully, and advice should be sought from clinicians familiar with these types of interactions.

Pioglitazone, a peroxisome proliferator-activated receptor- $\gamma$  agonist, has a mild triglyceride-lowering effect,

whereas rosiglitazone does not lower triglycerides (188, 189). Side effects reported include weight gain and risk of heart failure and macular edema (190). Of note, some data suggest an association between the use of pioglitazone and an increased risk of bladder cancer (191). Orlistat, an inhibitor of intestinal lipase that is used as a weight-loss drug, can lower postprandial triglyceride levels. It is a pharmacological method to reduce fat absorption, which may be helpful in patients with fasting hyperchylomicronemia (187). Orlistat has been used in combination with fibrates with additive effects. Side effects include bloating, diarrhea, incontinence, and oily leakage and are related to the amount of fat ingested in the diet. Furthermore, cases of severe liver injury have been reported to occur rarely with the use of orlistat.

### Acknowledgments

Address all correspondence and requests for reprints to: The Endocrine Society, 8401 Connecticut Avenue, Suite 900, Chevy Chase, Maryland 20815. E-mail: govt-prof@endo-society.org, Telephone: 301-941-0200. Address all commercial reprint requests for orders 101 and more to: Content Ed Net LLC, E-mail: ray.thibodeau@contentednet.com. Address all reprint requests for orders for 100 or fewer to Society Services, Telephone: 301-941-0210, E-mail: societyservices@endo-society.org, or Fax: 301-941-0257.

Cosponsoring Associations: American Heart Association, European Society of Endocrinology.

### Financial Disclosure of Task Force

**Lars Berglund, M.D., Ph.D.** (chair)—Financial or Business/Organizational Interests: NIH, AHA, Pfizer, Astra-Zeneca, Danone; Significant Financial Interest or Leadership Position: AHA, Pfizer, Astra-Zeneca. **John D. Brunzell, M.D.**—Financial or Business/Organizational Interests: American Diabetes Association, Endocrine Society, Amsterdam Molecular Therapeutics, Lexicon Genetics, Merck Research Laboratories, Daiichi Sankyo, University of Washington; Significant Financial Interest or Leadership Position: none declared. **Anne Carol Goldberg, M.D., F.A.C.P.**—Financial or Business/Organizational Interests: AHA, NIH/NHLBI, National Lipid Association, Foundation of the National Lipid Association, Washington University, Merck, Sanofi-Aventis, Roche, ISIS/Genzyme; Significant Financial Interest or Leadership Position: National Lipid Association, Foundation of the National Lipid Association. **Ira Jay Goldberg, M.D.**—Financial or Business/Organizational Interests: American Heart Association, American Diabetes Association, Astra-

Zeneca, GSK, Merck, Medcom, Amylin, Schering; Significant Financial Interest or Leadership Position: none declared. **Frank Sacks, M.D.**—Financial or Business/Organizational Interests: NIH/NHLBI, R3i Foundation, Metabolic Syndrome Institute, American Society of Nutrition, Sherborne-Gibbs, WebMD, Abbott, AstraZeneca, Aegerlan, Pfizer, Lilly, Isis, Genzyme, Roche, Genentech; Significant Financial Interest or Leadership Position: R3i Foundation, Metabolic Syndrome Institute, American Society of Nutrition. **Mohammad Hassan Murad, M.D.\***—Financial or Business/Organizational Interests: KER Unit (Mayo Clinic); Significant Financial Interest or Leadership Position: none declared. **Anton F. H. Stalenhoef, M.D., Ph.D., F.R.C.P.**—Financial or Business/Organizational Interests: Dutch Heart Foundation, Merck, Genzyme, Roche; Significant Financial Interest or Leadership Position: Dutch Journal of Medicine, Current Opinion Lipidology.

\* Evidence-based reviews for this guideline were prepared under contract with The Endocrine Society.

## References

- Atkins D, Best D, Briss PA, Eccles M, Falck-Ytter Y, Flottorp S, Guyatt GH, Harbour RT, Haugh MC, Henry D, Hill S, Jaeschke R, Leng G, Liberati A, Magrini N, Mason J, Middleton P, Mrukowicz J, O'Connell D, Oxman AD, Phillips B, Schünemann HJ, Edejer TT, Varonen H, Vist GE, Williams Jr JW, Zaza S 2004 Grading quality of evidence and strength of recommendations. *BMJ* 328:1490–1497
- Swiglo BA, Murad MH, Schünemann HJ, Kunz R, Vigersky RA, Guyatt GH, Montori VM 2008 A case for clarity, consistency, and helpfulness: state-of-the-art clinical practice guidelines in endocrinology using the grading of recommendations, assessment, development, and evaluation system. *J Clin Endocrinol Metab* 93:666–673
- 2002 Third Report of the National Cholesterol Education Program (NCEP) Expert Panel on Detection, Evaluation, and Treatment of High Blood Cholesterol in Adults (Adult Treatment Panel III) final report. *Circulation* 106:3143–3421
- Heiss G, Tamir I, Davis CE, Tyroler HA, Rifkind BM, Schonfeld G, Jacobs D, Frantz Jr ID 1980 Lipoprotein-cholesterol distributions in selected North American populations: the lipid research clinics program prevalence study. *Circulation* 61:302–315
- Ford ES, Li C, Zhao G, Pearson WS, Mokdad AH 2009 Hypertriglyceridemia and its pharmacologic treatment among US adults. *Arch Intern Med* 169:572–578
- Lewis B, Chait A, Wootton ID, Oakley CM, Krikler DM, Sigurdsson G, February A, Maurer B, Birkhead J 1974 Frequency of risk factors for ischaemic heart-disease in a healthy British population, with particular reference to serum-lipoprotein levels. *Lancet* 1:141–146
- Assmann G, Schulte H 1993 Results and conclusions of the prospective cardiovascular Munster (PROCAM) study. In: Assmann G, ed. *Lipid metabolism disorders and coronary heart disease*. Munich: MMV Medizin Verlag GmbH; 19–68
- Pang RW, Tam S, Janus ED, Siu ST, Ma OC, Lam TH, Lam KS 2006 Plasma lipid, lipoprotein and apolipoprotein levels in a random population sample of 2875 Hong Kong Chinese adults and their implications (NCEP ATP-III, 2001 guidelines) on cardiovascular risk assessment. *Atherosclerosis* 184:438–445
- Di Angelantonio E, Sarwar N, Perry P, Kaptoge S, Ray KK, Thompson A, Wood AM, Lewington S, Sattar N, Packard CJ, Collins R, Thompson SG, Danesh J 2009 Major lipids, apolipoproteins, and risk of vascular disease. *JAMA* 302:1993–2000
- Brunzell JD, Schrott HG 1973 The interaction of familial and secondary causes of hypertriglyceridemia: role in pancreatitis. *Trans Assoc Am Physicians* 86:245–254
- Chait A, Brunzell JD 1983 Severe hypertriglyceridemia: role of familial and acquired disorders. *Metabolism* 32:209–214
- Centers for Disease Control and Prevention 2010 Prevalence of abnormal lipid levels among youths—United States, 1999–2006. *MMWR Morb Mortal Wkly Rep* 59:29–33
- Müller-Riemenschneider F, Nocon M, Willich SN 2010 Prevalence of modifiable cardiovascular risk factors in German adolescents. *Eur J Cardiovasc Prev Rehabil* 17:204–210
- Murad MH, Hazem A, Coto-Yglesias F, Dzyubak S, Gupta S, Bancos I, Lane M, Erwin PJ, Berglund L, Elraiy T, Montori VM 2012 The association of hypertriglyceridemia with cardiovascular events and pancreatitis: a systematic review and meta-analysis. *BMC Endocrinol Disord* 12:2
- Nordestgaard BG, Benn M, Schnohr P, Tybjaerg-Hansen A 2007 Nonfasting triglycerides and risk of myocardial infarction, ischemic heart disease, and death in men and women. *JAMA* 298:299–308
- Bansal S, Buring JE, Rifai N, Mora S, Sacks FM, Ridker PM 2007 Fasting compared with nonfasting triglycerides and risk of cardiovascular events in women. *JAMA* 298:309–316
- Mora S, Rifai N, Buring JE, Ridker PM 2008 Fasting compared with nonfasting lipids and apolipoproteins for predicting incident cardiovascular events. *Circulation* 118:993–1001
- Stalenhoef AF, de Graaf J 2008 Association of fasting and nonfasting serum triglycerides with cardiovascular disease and the role of remnant-like lipoproteins and small, dense LDL. *Curr Opin Lipidol* 19:355–361
- Patsch JR, Miesenböck G, Hopferwieser T, Mühlberger V, Knapp E, Dunn JK, Gotto Jr AM, Patsch W 1992 Relation of triglyceride metabolism and coronary artery disease. Studies in the postprandial state. *Arterioscler Thromb* 12:1336–1345
- Karpe F 1999 Postprandial lipoprotein metabolism and atherosclerosis. *J Intern Med* 246:341–355
- Eberly LE, Stamler J, Neaton JD 2003 Relation of triglyceride levels, fasting and nonfasting, to fatal and nonfatal coronary heart disease. *Arch Intern Med* 163:1077–1083
- Ridker PM 2008 Fasting versus nonfasting triglycerides and the prediction of cardiovascular risk: do we need to revisit the oral triglyceride tolerance test? *Clin Chem* 54:11–13
- Warnick GR, Nakajima K 2008 Fasting versus nonfasting triglycerides: implications for laboratory measurements. *Clin Chem* 54:14–16
- Ginsberg HN 2002 New perspectives on atherogenesis: role of abnormal triglyceride-rich lipoprotein metabolism. *Circulation* 106:2137–2142
- Ayyobi AF, McGladdery SH, McNeely MJ, Austin MA, Motulsky AG, Brunzell JD 2003 Small, dense LDL and elevated apolipoprotein B are the common characteristics for the three major lipid phenotypes of familial combined hyperlipidemia. *Arterioscler Thromb Vasc Biol* 23:1289–1294
- Carr MC, Brunzell JD 2004 Abdominal obesity and dyslipidemia in the metabolic syndrome: importance of type 2 diabetes and familial combined hyperlipidemia in coronary artery disease risk. *J Clin Endocrinol Metab* 89:2601–2607
- Mann CJ, Yen FT, Grant AM, Bihain BE 1991 Mechanism of plasma cholesteryl ester transfer in hypertriglyceridemia. *J Clin Invest* 88:2059–2066
- Zambon A, Hokanson JE, Brown BG, Brunzell JD 1999 Evidence for a new pathophysiological mechanism for coronary artery re-



- gression: hepatic lipase-mediated changes in LDL density. *Circulation* 99:1959–1964
29. Sniderman AD, Wolfson C, Teng B, Franklin FA, Bachorik PS, Kwiterovich Jr PO 1982 Association of hyperapobetalipoproteinemia with endogenous hypertriglyceridemia and atherosclerosis. *Ann Intern Med* 97:833–839
  30. Austin MA, King MC, Vranizan KM, Krauss RM 1990 Atherogenic lipoprotein phenotype. A proposed genetic marker for coronary heart disease risk. *Circulation* 82:495–506
  31. St-Pierre AC, Cantin B, Dagenais GR, Mauriège P, Bernard PM, Després JP, Lamarche B 2005 Low-density lipoprotein subfractions and the long-term risk of ischemic heart disease in men: 13-year follow-up data from the Québec Cardiovascular Study. *Arterioscler Thromb Vasc Biol* 25:553–559
  32. Mora S, Szklo M, Otvos JD, Greenland P, Psaty BM, Goff Jr DC, O'Leary DH, Saad MF, Tsai MY, Sharrett AR 2007 LDL particle subclasses, LDL particle size, and carotid atherosclerosis in the Multi-Ethnic Study of Atherosclerosis (MESA). *Atherosclerosis* 192:211–217
  33. Musunuru K, Orho-Melander M, Caulfield MP, Li S, Salameh WA, Reitz RE, Berglund G, Hedblad B, Engström G, Williams PT, Kathiresan S, Melander O, Krauss RM 2009 Ion mobility analysis of lipoprotein subfractions identifies three independent axes of cardiovascular risk. *Arterioscler Thromb Vasc Biol* 29:1975–1980
  34. Baigent C, Keech A, Kearney PM, Blackwell L, Buck G, Pollicino C, Kirby A, Sourjina T, Peto R, Collins R, Simes R 2005 Efficacy and safety of cholesterol-lowering treatment: prospective meta-analysis of data from 90,056 participants in 14 randomised trials of statins. *Lancet* 366:1267–1278
  35. Sacks FM, Campos H 2003 Low density lipoprotein and cardiovascular disease: a reappraisal. (Clinical Review 163). *J Clin Endocrinol Metab* 88:4525–4532
  36. Mora S 2009 Advanced lipoprotein testing and subfractionation are not (yet) ready for routine clinical use. *Circulation* 119:2396–2404
  37. Ip S, Lichtenstein AH, Chung M, Lau J, Balk EM 2009 Systematic review: association of low-density lipoprotein subfractions with cardiovascular outcomes. *Ann Intern Med* 150:474–484
  38. Mora S, Otvos JD, Rifai N, Rosenson RS, Buring JE, Ridker PM 2009 Lipoprotein particle profiles by nuclear magnetic resonance compared with standard lipids and apolipoproteins in predicting incident cardiovascular disease in women. *Circulation* 119:931–939
  39. Campos H, Moye LA, Glasser SP, Stampfer MJ, Sacks FM 2001 Low density lipoprotein size, pravastatin treatment, and coronary events. *JAMA* 286:1468–1474
  40. de Graaf J, Couture P, Sniderman A 2008 A diagnostic algorithm for the atherogenic apolipoprotein B dyslipoproteinemias. *Nat Clin Pract Endocrinol Metab* 4:608–618
  41. Hollewin S, den Heijer M, Swinkels DW, Stalenhoef AF, de Graaf J 2010 Apolipoprotein B, non-HDL cholesterol and LDL cholesterol for identifying individuals at increased cardiovascular risk. *J Intern Med* 268:567–577
  42. Utermann G 1989 The mysteries of lipoprotein(a). *Science* 246:904–910
  43. Bennet A, Di Angelantonio E, Erqou S, Eiriksdottir G, Sigurdsson G, Woodward M, Rumley A, Lowe GD, Danesh J, Gudnason V 2008 Lipoprotein (a) levels and risk of future coronary heart disease: large-scale prospective data. *Arch Intern Med* 168:598–608
  44. Erqou S, Kaptoge S, Perry PL, Di Angelantonio E, Thompson A, White IR, Marcovina SM, Collins R, Thompson SG, Danesh J 2009 Lipoprotein(a) concentration and the risk of coronary heart disease, stroke, and nonvascular mortality. *JAMA* 302:412–423
  45. Kamstrup PR, Tybjaerg-Hansen A, Steffensen R, Nordestgaard BG 2009 Genetically elevated lipoprotein (a) and increased risk for myocardial infarction. *JAMA* 301:2331–2339
  46. Anuurad E, Enkhmaa B, Berglund L 2010 Enigmatic role of lipoprotein(a) in cardiovascular disease. *Clin Transl Sci* 3:327–332
  47. Gylling H, Vega GL, Grundy SM 1992 Physiologic mechanisms for reduced apolipoprotein A-I concentrations associated with low HDL cholesterol in patients with normal plasma lipids. *J Lipid Res* 33:1527–1539
  48. Brinton EA, Eisenberg S, Breslow JL 1994 Human HDL cholesterol levels are determined by apoA-I fractional catabolic rate, which correlates inversely with estimates of HDL particle size. *Arterioscler Thromb* 14:707–720
  49. Deeb SS, Zambon A, Carr MC, Ayyobi AF, Brunzell JD 2003 Hepatic lipase and dyslipidemia: interactions among genetic variants, obesity, gender and diet. *J Lipid Res* 44:1279–1286
  50. Stampfer MJ, Sacks FM, Salvini S, Willett WC, Hennekens CH 1991 A prospective study of cholesterol, apolipoproteins, and the risk of myocardial infarction. *N Engl J Med* 325:373–381
  51. Sweetnam PM, Bolton CH, Yarnell JW, Bainton D, Baker IA, Elwood PC, Miller NE 1994 Associations of the HDL2 and HDL3 cholesterol subfractions with the development of ischemic heart disease in British men. The Caerphilly and Speedwell Collaborative Heart Disease Studies. *Circulation* 90:769–774
  52. Lamarche B, Tchernof A, Moorjani S, Cantin B, Dagenais GR, Lupien PJ, Després JP 1997 Small, dense low-density lipoprotein particles as a predictor of the risk of ischemic heart disease in men. Prospective results from the Quebec Cardiovascular Study. *Circulation* 95:69–75
  53. Asztalos BF, Cupples LA, Demissie S, Horvath KV, Cox CE, Battista MC, Schaefer EJ 2004 High-density lipoprotein subpopulation profile and coronary heart disease prevalence in male participants of the Framingham Offspring Study. *Arterioscler Thromb Vasc Biol* 24:2181–2187
  54. Asztalos BF, Collins D, Horvath KV, Bloomfield HE, Robins SJ, Schaefer EJ 2008 Relation of gemfibrozil treatment and high-density lipoprotein subpopulation profile with cardiovascular events in the Veterans Affairs High-Density Lipoprotein Intervention Trial. *Metabolism* 57:77–83
  55. van der Steeg WA, Holme I, Boekholdt SM, Larsen ML, Lindahl C, Stroes ES, Tikkanen MJ, Wareham NJ, Faergeman O, Olsson AG, Pedersen TR, Khaw KT, Kastelein JJ 2008 High-density lipoprotein cholesterol, high-density lipoprotein particle size, and apolipoprotein A-I: significance for cardiovascular risk: the IDEAL and EPIC-Norfolk studies. *J Am Coll Cardiol* 51:634–642
  56. Cohn JS, McNamara JR, Cohn SD, Ordovas JM, Schaefer EJ 1988 Plasma apolipoprotein changes in the triglyceride-rich lipoprotein fraction of human subjects fed a fat-rich meal. *J Lipid Res* 29:925–936
  57. Karpe F, Bell M, Björkegren J, Hamsten A 1995 Quantification of postprandial triglyceride-rich lipoproteins in healthy men by retinyl ester labeling and simultaneous measurement of apolipoproteins B-48 and B-100. *Arterioscler Thromb Vasc Biol* 15:199–207
  58. Campos H, Khoo C, Sacks FM 2005 Diurnal and acute patterns of postprandial apolipoprotein B-48 in VLDL, IDL, and LDL from normolipidemic humans. *Atherosclerosis* 181:345–351
  59. Nakano T, Tanaka A, Okazaki M, Tokita Y, Nagamine T, Nakajima K 2011 Particle size of apoB-48 carrying lipoproteins in remnant lipoproteins isolated from postprandial plasma. *Ann Clin Biochem* 48:57–64
  60. Tabas I, Williams KJ, Borén J 2007 Subendothelial lipoprotein retention as the initiating process in atherosclerosis: update and therapeutic implications. *Circulation* 116:1832–1844
  61. Kannel WB, Vasan RS 2009 Triglycerides as vascular risk factors: new epidemiologic insights. *Curr Opin Cardiol* 24:345–350
  62. Batal R, Tremblay M, Barrett PH, Jacques H, Fredenrich A, Mamer O, Davignon J, Cohn JS 2000 Plasma kinetics of apoC-III and apoE in normolipidemic and hypertriglyceridemic subjects. *J Lipid Res* 41:706–718
  63. Cohn JS, Patterson BW, Uffelman KD, Davignon J, Steiner G 2004 Rate of production of plasma and very-low-density lipoprotein (VLDL) apolipoprotein C-III is strongly related to the concentration and level of production of VLDL triglyceride in male subjects

- with different body weights and levels of insulin sensitivity. *J Clin Endocrinol Metab* 89:3949–3955
64. Zheng C, Khoo C, Ikewaki K, Sacks FM 2007 Rapid turnover of apolipoprotein C-III-containing triglyceride-rich lipoproteins contributing to the formation of LDL subfractions. *J Lipid Res* 48:1190–1203
65. Ooi EM, Barrett PH, Chan DC, Watts GF 2008 Apolipoprotein C-III: understanding an emerging cardiovascular risk factor. *Clin Sci* 114:611–624
66. Malmström R, Packard CJ, Caslake M, Bedford D, Stewart P, Yki-Järvinen H, Shepherd J, Taskinen MR 1997 Defective regulation of triglyceride metabolism by insulin in the liver in NIDDM. *Diabetologia* 40:454–462
67. Kamagate A, Dong HH 2008 FoxO1 integrates insulin signaling to VLDL production. *Cell Cycle* 7:3162–3170
68. Lee SJ, Moye LA, Campos H, Williams GH, Sacks FM 2003 Hypertriglyceridemia but not diabetes status is associated with VLDL containing apolipoprotein CIII in patients with coronary heart disease. *Atherosclerosis* 167:293–302
69. Cheal KL, Abbasi F, Lamendola C, McLaughlin T, Reaven GM, Ford ES 2004 Relationship to insulin resistance of the adult treatment panel III diagnostic criteria for identification of the metabolic syndrome. *Diabetes* 53:1195–1200
70. Aarsland A, Chinkes D, Wolfe RR 1996 Contributions of *de novo* synthesis of fatty acids to total VLDL-triglyceride secretion during prolonged hyperglycemia/hyperinsulinemia in normal man. *J Clin Invest* 98:2008–2017
71. McLaughlin T, Abbasi F, Lamendola C, Yeni-Komshian H, Reaven G 2000 Carbohydrate-induced hypertriglyceridemia: an insight into the link between plasma insulin and triglyceride concentrations. *J Clin Endocrinol Metab* 85:3085–3088
72. Sumner AE, Finley KB, Genovese DJ, Criqui MH, Boston RC 2005 Fasting triglyceride and the triglyceride-HDL cholesterol ratio are not markers of insulin resistance in African Americans. *Arch Intern Med* 165:1395–1400
73. Chan DC, Watts GF, Nguyen MN, Barrett PH 2006 Apolipoproteins C-III and A-V as predictors of very-low-density lipoprotein triglyceride and apolipoprotein B-100 kinetics. *Arterioscler Thromb Vasc Biol* 26:590–596
74. Brunzell JD, Hazzard WR, Porte Jr D, Bierman EL 1973 Evidence for a common, saturable triglyceride removal mechanism for chylomicrons and very low density lipoproteins in man. *J Clin Invest* 52:1578–1585
75. Gin P, Yin L, Davies BS, Weinstein MM, Ryan RO, Bensadoun A, Fong LG, Young SG, Beigneux AP 2008 The acidic domain of GPIHBP1 is important for the binding of lipoprotein lipase and chylomicrons. *J Biol Chem* 283:29554–29562
76. Olivecrona G, Ehrenborg E, Semb H, Makoveichuk E, Lindberg A, Hayden MR, Gin P, Davies BS, Weinstein MM, Fong LG, Beigneux AP, Young SG, Olivecrona T, Hernell O 2010 Mutation of conserved cysteines in the Ly6 domain of GPIHBP1 in familial chylomicronemia. *J Lipid Res* 51:1535–1545
77. Péterfy M, Ben-Zeev O, Mao HZ, Weissglas-Volkov D, Aouizerat BE, Pullinger CR, Frost PH, Kane JP, Malloy MJ, Reue K, Pajukanta P, Doolittle MH 2007 Mutations in LMF1 cause combined lipase deficiency and severe hypertriglyceridemia. *Nat Genet* 39:1483–1487
78. Brunzell JD 2007 Clinical practice. Hypertriglyceridemia. *N Engl J Med* 357:1009–1017
79. Zheng C, Khoo C, Furtado J, Sacks FM 2010 Apolipoprotein C-III and the metabolic basis for hypertriglyceridemia and the dense LDL phenotype. *Circulation* 121:1722–1734
80. Havel PJ 2005 Dietary fructose: implications for dysregulation of energy homeostasis and lipid/carbohydrate metabolism. *Nutr Rev* 63:133–157
81. Lichtenstein AH, Appel LJ, Brands M, Carnethon M, Daniels S, Franch HA, Franklin B, Kris-Etherton P, Harris WS, Howard B, Karanja N, Lefevre M, Rudel L, Sacks F, Van Horn L, Winston M, Wylie-Rosett J 2006 Summary of American Heart Association Diet and Lifestyle Recommendation revision. *Arterioscler Thromb Vasc Biol* 26:2186–2191
82. Brunzell JD, Deeb SS 2001 Familial lipoprotein lipase deficiency, ApoC-II deficiency, and hepatic lipase deficiency. In: Scriver CR, Beaudet AL, Sly WS, Valle D, eds. *The metabolic basis of inherited disease*. 8th ed. New York: McGraw-Hill; 2789–2816
83. Brunzell JD, Ayyobi AF 2003 Dyslipidemia in the metabolic syndrome and type 2 diabetes mellitus. *Am J Med* 115(Suppl 8A):24S–28S
84. Tamburrano G, Durante C, Baldelli R 2002 Therapy of diabetes and dyslipidemia in acromegaly. *Pituitary* 5:27–31
85. Sanderson SL, Iverius PH, Wilson DE 1991 Successful hyperlipemic pregnancy. *JAMA* 265:1858–1860
86. Saadi HF, Kurlander DJ, Erkins JM, Hoogwerf BJ 1999 Severe hypertriglyceridemia and acute pancreatitis during pregnancy: treatment with gemfibrozil. *Endocr Pract* 5:33–36
87. Walsh BW, Schiff I, Rosner B, Greenberg L, Ravnika V, Sacks FM 1991 Effects of postmenopausal estrogen replacement on the concentrations and metabolism of plasma lipoproteins. *N Engl J Med* 325:1196–1204
88. Adami S, Rossini M, Zamberlan N, Bertoldo F, Dorizzi R, Lo Cascio V 1993 Long-term effects of transdermal and oral estrogens on serum lipids and lipoproteins in postmenopausal women. *Maturitas* 17:191–196
89. Mosca L, Harper K, Sarkar S, O’Gorman J, Anderson PW, Cox DA, Barrett-Connor E 2001 Effect of raloxifene on serum triglycerides in postmenopausal women: influence of predisposing factors for hypertriglyceridemia. *Clin Ther* 23:1552–1565
90. Carr MC, Knopp RH, Brunzell JD, Wheeler BS, Zhu X, Lakshmanan M, Rosen AS, Anderson PW 2005 Effect of raloxifene on serum triglycerides in women with a history of hypertriglyceridemia while on oral estrogen therapy. *Diabetes Care* 28:1555–1561
91. Morganroth J, Levy RI, Fredrickson DS 1975 The biochemical, clinical, and genetic features of type III hyperlipoproteinemia. *Ann Intern Med* 82:158–174
92. Lindner MA, Illingworth DR 1988 Expression of type III hyperlipoproteinemia in an adolescent patient with hypothyroidism. *J Pediatr* 113:86–89
93. Retnakaran R, Connelly PW, Goguen J 2005 Unmasking of type III hyperlipoproteinemia by hypothyroidism: a dramatic illustration of altered lipoprotein metabolism in a postpartum woman. *Endocr Pract* 11:394–398
94. Stone NJ 1994 Secondary causes of hyperlipidemia. *Med Clin North Am* 78:117–141
95. Garg A, Agarwal AK 2009 Lipodystrophies: disorders of adipose tissue biology. *Biochim Biophys Acta* 1791:507–513
96. Simha V, Garg A 2009 Inherited lipodystrophies and hypertriglyceridemia. *Curr Opin Lipidol* 20:300–308
97. Herbst KL, Tannock LR, Deeb SS, Purnell JQ, Brunzell JD, Chait A 2003 Kobberling type of familial partial lipodystrophy: an unrecognized syndrome. *Diabetes Care* 26:1819–1824
98. Bandsma RH, Smit GP, Kuipers F 2002 Disturbed lipid metabolism in glycogen storage disease I. *Eur J Pediatr* 161:S65–S69
99. Carr A, Samaras K, Chisholm DJ, Cooper DA 1998 Pathogenesis of HIV-1-protease inhibitor-associated peripheral lipodystrophy, hyperlipidaemia, and insulin resistance. *Lancet* 351:1881–1883
100. Huang-Doran I, Sleight A, Rochford JJ, O’Rahilly S, Savage DB 2010 Lipodystrophy: metabolic insight from a rare disorder. *J Endocrinol* 207:245–255
101. Grunfeld C, Kotler DP, Shigenaga JK, Doerrler W, Tierney A, Wang J, Pierson Jr RN, Feingold KR 1991 Circulating interferon- $\alpha$  levels and hypertriglyceridemia in the acquired immunodeficiency syndrome. *Am J Med* 90:154–162
102. Nonogaki K, Moser AH, Feingold KR, Grunfeld C 1994  $\alpha$ -Adrenergic receptors mediate the hypertriglyceridemia induced by endotoxin, but not tumor necrosis factor, in rats. *Endocrinology* 135:2644–2650

103. Kronenberg F 2005 Dyslipidemia and nephrotic syndrome: recent advances. *J Ren Nutr* 15:195–203
104. Kaysen GA 2009 Lipid and lipoprotein metabolism in chronic kidney disease. *J Ren Nutr* 19:73–77
105. Luo L, Pu X, Wang Y, Xu N 2010 Impaired plasma lipid profiles in acute hepatitis. *Lipids Health Dis* 9:5
106. Brinton EA 2010 Effects of ethanol intake on lipoproteins and atherosclerosis. *Curr Opin Lipidol* 21:346–351
107. Taskinen MR, Nikkilä EA, Välimäki M, Sane T, Kuusi T, Kesäniemi A, Ylikahri R 1987 Alcohol-induced changes in serum lipoproteins and in their metabolism. *Am Heart J* 113:458–464
108. Kissebah AH, Harrigan P, Wynn V 1973 Mechanism of hypertriglyceridaemia associated with contraceptive steroids. *Horm Metab Res* 5:184–190
109. Stuyt PM, Demacker PN, Stalenhoef AF 1986 Pancreatitis induced by oestrogen in a patient with type I hyperlipoproteinaemia. *Br Med J (Clin Res Ed)* 293:734
110. Bershad S, Rubinstein A, Paterniti JR, Le NA, Poliak SC, Heller B, Ginsberg HN, Fleischmajer R, Brown WV 1985 Changes in plasma lipids and lipoproteins during isotretinoin therapy for acne. *N Engl J Med* 313:16:981–985
111. Vu-Dac N, Gervois P, Torra IP, Fruchart JC, Kosykh V, Kooistra T, Princen HM, Dallongeville J, Staels B 1998 Retinoids increase human apo C-III expression at the transcriptional level via the retinoid X receptor. Contribution to the hypertriglyceridemic action of retinoids. *J Clin Invest* 102:625–632
112. Davies PJ, Berry SA, Shipley GL, Eckel RH, Hennuyer N, Crombie DL, Ogilvie KM, Peinado-Onsurbe J, Fievet C, Leibowitz MD, Heyman RA, Auwerx J 2001 Metabolic effects of retinoids: tissue-specific regulation of lipoprotein lipase activity. *Mol Pharmacol* 59:170–176
113. Crouse 3rd JR 1987 Hypertriglyceridemia: a contraindication to the use of bile acid binding resins. *Am J Med* 83:243–248
114. De Clercq E 2009 Anti-HIV drugs: 25 compounds approved within 25 years after the discovery of HIV. *Int J Antimicrob Agents* 33:307–320
115. Hakeam HA, Al-Jedai AH, Raza SM, Hamawi K 2008 Sirolimus induced dyslipidemia in tacrolimus based vs. tacrolimus free immunosuppressive regimens in renal transplant recipients. *Ann Transplant* 13:46–53
116. Casey DE 2004 Dyslipidemia and atypical antipsychotic drugs. *J Clin Psychiatry* 65(Suppl 18):27–35
117. Veerkamp MJ, de Graaf J, Hendriks JC, Demacker PN, Stalenhoef AF 2004 Nomogram to diagnose familial combined hyperlipidemia on the basis of results of a 5-year follow-up study. *Circulation* 109:2980–2985
118. Austin MA, McKnight B, Edwards KL, Bradley CM, McNeely MJ, Psaty BM, Brunzell JD, Motulsky AG 2000 Cardiovascular disease mortality in familial forms of hypertriglyceridemia: a 20-year prospective study. *Circulation* 101:2777–2782
119. Genest Jr JJ, Martin-Munley SS, McNamara JR, Ordovas JM, Jenner J, Myers RH, Silberman SR, Wilson PW, Salem DN, Schaefer EJ 1992 Familial lipoprotein disorders in patients with premature coronary artery disease. *Circulation* 85:2025–2033
120. Genest Jr J, Bard JM, Fruchart JC, Ordovas JM, Schaefer EJ 1993 Familial hypoalphalipoproteinemia in premature coronary artery disease. *Arterioscler Thromb* 13:1728–1737
121. Mahley RW, Huang Y, Rall Jr SC 1999 Pathogenesis of type III hyperlipoproteinemia (dysbetalipoproteinemia). Questions, quandaries, and paradoxes. *J Lipid Res* 40:1933–1949
122. Smit M, de Knijff P, van der Kooij-Meijis E, Groenendijk C, van den Maagdenberg AM, Gevers Leuven JA, Stalenhoef AF, Stuyt PM, Frants RR, Havekes LM 1990 Genetic heterogeneity in familial dysbetalipoproteinemia. The E2(lys146 — gln) variant results in a dominant mode of inheritance. *J Lipid Res* 31:45–53
123. de Knijff P, van den Maagdenberg AM, Stalenhoef AF, Leuven JA, Demacker PN, Kuyt LP, Frants RR, Havekes LM 1991 Familial dysbetalipoproteinemia associated with apolipoprotein E3-Leiden in an extended multigeneration pedigree. *J Clin Invest* 88:643–655
124. Stalenhoef AF, Malloy MJ, Kane JP, Havel RJ 1986 Metabolism of apolipoproteins B-48 and B-100 of triglyceride-rich lipoproteins in patients with familial dysbetalipoproteinemia. *J Clin Invest* 78:722–728
125. Grundy SM, Cleeman JI, Daniels SR, Donato KA, Eckel RH, Franklin BA, Gordon DJ, Krauss RM, Savage PJ, Smith Jr SC, Spertus JA, Costa F 2005 Diagnosis and management of the metabolic syndrome: an American Heart Association/National Heart, Lung and Blood Institute scientific statement. *Circulation* 112:2735–2752
126. Alberti KG, Eckel RH, Grundy SM, Zimmet PZ, Cleeman JI, Donato KA, Fruchart JC, James WP, Loria CM, Smith Jr SC 2009 Harmonizing the metabolic syndrome: a joint interim statement of the International Diabetes Federation Task Force on Epidemiology and Prevention; National Heart, Lung, and Blood Institute; American Heart Association; World Heart Federation; International Atherosclerosis Society; and International Association for the Study of Obesity. *Circulation* 120:1640–1645
127. Nieves DJ, Cnop M, Retzlaff B, Walden CE, Brunzell JD, Knopp RH, Kahn SE 2003 The atherogenic lipoprotein profile associated with obesity and insulin resistance is largely attributable to intra-abdominal fat. *Diabetes* 52:172–179
128. Blackburn P, Lemieux I, Alméras N, Bergeron J, Côté M, Tremblay A, Lamarche B, Després JP 2009 The hypertriglyceridemic waist phenotype versus the National Cholesterol Education Program-Adult Treatment Panel III and International Diabetes Federation clinical criteria to identify high-risk men with an altered cardiometabolic risk profile. *Metabolism* 58:1123–1130
129. Tessari P, Coracina A, Cosma A, Tiengo A 2009 Hepatic lipid metabolism and nonalcoholic fatty liver disease. *Nutr Metab Cardiovasc Dis* 19:291–302
130. Szendroedi J, Roden M 2009 Ectopic lipids and organ function. *Curr Opin Lipidol* 20:50–56
131. van Herpen NA, Schrauwen-Hinderling VB 2008 Lipid accumulation in non-adipose tissue and lipotoxicity. *Physiol Behav* 94:231–241
132. Hokanson JE, Austin MA 1996 Plasma triglyceride level is a risk factor for cardiovascular disease independent of high-density lipoprotein cholesterol level: a meta-analysis of population-based prospective studies. *J Cardiovasc Risk* 3:213–219
133. Sarwar N, Danesh J, Eiriksdottir G, Sigurdsson G, Wareham N, Bingham S, Boekholdt SM, Khaw KT, Gudnason V 2007 Triglycerides and the risk of coronary heart disease: 10,158 incident cases among 262,525 participants in 29 Western prospective studies. *Circulation* 115:450–458
134. Patel A, Barzi F, Jamrozik K, Lam TH, Ueshima H, Whitlock G, Woodward M; Asia Pacific Cohort Studies Collaboration 2004 Serum triglycerides as a risk factor for cardiovascular diseases in the Asia-Pacific region. *Circulation* 110:2678–2686
135. Tirosh A, Rudich A, Shochat T, Tekes-Manova D, Israeli E, Henkin Y, Kochba I, Shai I 2007 Changes in triglyceride levels and risk for coronary heart disease in young men. *Ann Intern Med* 147:377–385
136. Danesh J, Erqou S, Walker M, Thompson SG, Tipping R, Ford C, Pressel S, Walldius G, Jungner I, Folsom AR, Chambless LE, Knuiman M, Whincup PH, Wannamethee SG, Morris RW, Willeit J, Kiehl S, Santer P, Mayr A, Wald N, Ebrahim S, Lawlor DA, Yarnell JW, Gallacher J, Casiglia E, Tikhonoff V, Nietert PJ, Sutherland SE, Bachman DL, Keil JE, Cushman M, Psaty BM, Tracy RP, Tybjaerg-Hansen A, *et al.* 2007 The Emerging Risk Factors Collaboration: analysis of individual data on lipid, inflammatory and other markers in over 1.1 million participants in 104 prospective studies of cardiovascular diseases. *Eur J Epidemiol* 22:839–869
137. Nordestgaard BG, Tybjaerg-Hansen A, Lewis B 1992 Influx in vivo of low density, intermediate density, and very low density



- lipoproteins into aortic intimas of genetically hyperlipidemic rabbits. Roles of plasma concentrations, extent of aortic lesion, and lipoprotein particle size as determinants. *Arterioscler Thromb* 12: 6–18
138. Zhang X, Qi R, Xian X, Yang F, Blackstein M, Deng X, Fan J, Ross C, Karasinska J, Hayden MR, Liu G 2008 Spontaneous atherosclerosis in aged lipoprotein lipase-deficient mice with severe hypertriglyceridemia on a normal chow diet. *Circ Res* 102:250–256
  139. Weinstein MM, Yin L, Tu Y, Wang X, Wu X, Castellani LW, Walzem RL, Lusis AJ, Fong LG, Beigneux AP, Young SG 2010 Chylomicronemia elicits atherosclerosis in mice—brief report. *Arterioscler Thromb Vasc Biol* 30:20–23
  140. Marcoux C, Hopkins PN, Wang T, Leary ET, Nakajima K, Davignon J, Cohn JS 2000 Remnant-like particle cholesterol and triglyceride levels of hypertriglyceridemic patients in the fed and fasted state. *J Lipid Res* 41:1428–1436
  141. Nakamura T, Takano H, Umetani K, Kawabata K, Obata JE, Kitta Y, Kodama Y, Mende A, Ichigi Y, Fujioka D, Saito Y, Kugiyama K 2005 Remnant lipoproteinemia is a risk factor for endothelial vasomotor dysfunction and coronary artery disease in metabolic syndrome. *Atherosclerosis* 181:321–327
  142. Havel RJ 1994 Postprandial hyperlipidemia and remnant lipoproteins. *Curr Opin Lipidol* 5:102–109
  143. Zilversmit DB 1979 Atherogenesis: a postprandial phenomenon. *Circulation* 60:473–485
  144. Véniant MM, Beigneux AP, Bensadoun A, Fong LG, Young SG 2008 Lipoprotein size and susceptibility to atherosclerosis—insights from genetically modified mouse models. *Curr Drug Targets* 9:174–189
  145. Karpe F, Taskinen MR, Nieminen MS, Frick MH, Kesäniemi YA, Pasternack A, Hamsten A, Syväne M 2001 Remnant-like lipoprotein particle cholesterol concentration and progression of coronary and vein-graft atherosclerosis in response to gemfibrozil treatment. *Atherosclerosis* 157:181–187
  146. Véniant MM, Pierotti V, Newland D, Cham CM, Sanan DA, Walzem RL, Young SG 1997 Susceptibility to atherosclerosis in mice expressing exclusively apolipoprotein B48 or apolipoprotein B100. *J Clin Invest* 100:180–188
  147. Zhang WY, Schwartz E, Wang Y, Attrep J, Li Z, Reaven P 2006 Elevated concentrations of nonesterified fatty acids increase monocyte expression of CD11b and adhesion to endothelial cells. *Arterioscler Thromb Vasc Biol* 26:514–519
  148. Gimbrone Jr MA 1995 Vascular endothelium: an integrator of pathophysiologic stimuli in atherosclerosis. *Am J Cardiol* 75:67B–70B
  149. Olufadi R, Byrne CD 2006 Effects of VLDL and remnant particles on platelets. *Pathophysiol Haemost Thromb* 35:281–291
  150. Rutledge JC, Woo MM, Rezai AA, Curtiss LK, Goldberg IJ 1997 Lipoprotein lipase increases lipoprotein binding to the artery wall and increases endothelial layer permeability by formation of lipolysis products. *Circ Res* 80:819–828
  151. Johnson RK, Appel LJ, Brands M, Howard BV, Lefevre M, Lustig RH, Sacks F, Steffen LM, Wylie-Rosett J; on behalf of the American Heart Association Nutrition Committee of the Council on Nutrition, Physical Activity, and Metabolism and the Council on Epidemiology and Prevention 2009 Dietary sugars intake and cardiovascular health: a scientific statement from the American Heart Association. *Circulation* 120:1011–1020
  152. Mensink RP, Zock PL, Kester AD, Katan MB 2003 Effects of dietary fatty acids and carbohydrates on the ratio of serum total to HDL cholesterol and on serum lipids and apolipoproteins: a meta-analysis of 60 controlled trials. *Am J Clin Nutr* 77:1146–1155
  153. Wolever TM, Jenkins DJ, Jenkins AL, Josse RG 1991 The glycemic index: methodology and clinical implications. *Am J Clin Nutr* 54: 846–854
  154. Ludwig DS 2002 The glycemic index: physiological mechanisms relating to obesity, diabetes, and cardiovascular disease. *JAMA* 287:2414–2423
  155. Appel LJ, Sacks FM, Carey VJ, Obarzanek E, Swain JF, Miller 3rd ER, Conlin PR, Erlinger TP, Rosner BA, Laranjo NM, Charleston J, McCarron P, Bishop LM 2005 Effects of protein, monounsaturated fat, and carbohydrate intake on blood pressure and serum lipids: results of the OmniHeart Randomized Trial. *JAMA* 294: 2455–2464
  156. de Souza RJ, Swain JF, Appel LJ, Sacks FM 2008 Alternatives for macronutrient intake and chronic disease: a comparison of the OmniHeart diets with popular diets and with dietary recommendations. *Am J Clin Nutr* 88:1–11
  157. Furtado JD, Campos H, Sumner AE, Appel LJ, Carey VJ, Sacks FM 2010 Dietary interventions that lower lipoproteins containing apolipoprotein C-III are more effective in whites than in blacks: results of the OmniHeart trial. *Am J Clin Nutr* 92:714–722
  158. Graham TE 2004 Exercise, postprandial triacylglyceridemia, and cardiovascular disease risk. *Can J Appl Physiol* 29:781–799
  159. Dekker MJ, Graham TE, Ooi TC, Robinson LE 2010 Exercise prior to fat ingestion lowers fasting and postprandial VLDL and decreases adipose tissue IL-6 and GIP receptor mRNA in hypertriacylglycerolemic men. *J Nutr Biochem* 21:983–990
  160. Tambalis K, Panagiotakos DB, Kavouras SA, Sidossis LS 2009 Responses of blood lipids to aerobic, resistance, and combined aerobic with resistance exercise training: a systematic review of current evidence. *Angiology* 60:614–632
  161. Pitsavos C, Panagiotakos DB, Tambalis KD, Chrysohooou C, Sidossis LS, Skoumas J, Stefanadis C 2009 Resistance exercise plus to aerobic activities is associated with better lipids' profile among healthy individuals: the ATTICA study. *QJM* 102:609–616
  162. Foster GD, Wyatt HR, Hill JO, Makris AP, Rosenbaum DL, Brill C, Stein RI, Mohammed BS, Miller B, Rader DJ, Zemel B, Wadden TA, Tenhave T, Newcomb CW, Klein S 2010 Weight and metabolic outcomes after 2 years on a low-carbohydrate versus low-fat diet: a randomized trial. *Ann Intern Med* 153:147–157
  163. Sacks FM, Bray GA, Carey VJ, Smith SR, Ryan DH, Anton SD, McManus K, Champagne CM, Bishop LM, Laranjo N, Leboff MS, Rood JC, de Jonge L, Greenway FL, Loria CM, Obarzanek E, Williamson DA 2009 Comparison of weight-loss diets with different compositions of fat, protein, and carbohydrates. *N Engl J Med* 360:859–873
  164. Brunzell JD, Davidson M, Furberg CD, Goldberg RB, Howard BV, Stein JH, Witztum JL 2008 Lipoprotein management in patients with cardiometabolic risk: consensus conference report from the American Diabetes Association and the American College of Cardiology Foundation. *J Am Coll Cardiol* 51:1512–1524
  165. Frick MH, Elo O, Haapa K, Heinonen OP, Heinsalmi P, Helo P, Huttunen JK, Kaitaniemi P, Koskinen P, Manninen V 1987 Helsinki Heart Study: primary-prevention trial with gemfibrozil in middle-aged men with dyslipidemia. Safety of treatment, changes in risk factors, and incidence of coronary heart disease. *N Engl J Med* 317:1237–1245
  166. Rubins HB, Robins SJ, Collins D, Fye CL, Anderson JW, Elam MB, Faas FH, Linares E, Schaefer EJ, Schectman G, Wilt TJ, Wittes J for the Veterans Affairs High-Density Lipoprotein Cholesterol Intervention Trial Study Group 1999 Gemfibrozil for the secondary prevention of coronary heart disease in men with low levels of high-density lipoprotein cholesterol. *N Engl J Med* 341:410–418
  167. The BIP Study Group 2000 Secondary prevention by raising HDL cholesterol and reducing triglycerides in patients with coronary artery disease: the Bezafibrate Infarction Prevention (BIP) study. *Circulation* 102:21–27
  168. Keech A, Simes RJ, Barter P, Best J, Scott R, Taskinen MR, Forder P, Pillai A, Davis T, Glasziou P, Drury P, Kesäniemi YA, Sullivan D, Hunt D, Colman P, d'Emden M, Whiting M, Ehnholm C, Laakso M 2005 Effects of long-term fenofibrate therapy on cardiovascular events in 9795 people with type 2 diabetes mellitus (the FIELD study): randomised controlled trial. *Lancet* 366:1849–1861
  169. Ginsberg HN, Elam MB, Lovato LC, Crouse 3rd JR, Leiter LA,



- Linz P, Friedewald WT, Buse JB, Gerstein HC, Probstfield J, Grimm RH, Ismail-Beigi F, Bigger JT, Goff Jr DC, Cushman WC, Simons-Morton DG, Byington RP 2010 Effects of combination lipid therapy in type 2 diabetes mellitus. *N Engl J Med* 362:1563–1574
170. Aboubih S, Filion KB, Joseph L, Schiffrin EL, Rinfret S, Poirier P, Pilote L, Genest J, Eisenberg MJ 2009 Effects of fibrates on lipid profiles and cardiovascular outcomes: a systematic review. *Am J Med* 122:962.e1–962.e8
  171. Jun M, Foote C, Lv J, Neal B, Patel A, Nicholls SJ, Grobbee DE, Cass A, Chalmers J, Perkovic V 2010 Effects of fibrates on cardiovascular outcomes: a systematic review and meta-analysis. *Lancet* 375:1875–1884
  172. Sacks FM 2008 After the Fenofibrate Intervention and Event Lowering in Diabetes (FIELD) study: implications for fenofibrate. *Am J Cardiol* 102:34L–40L
  173. Carlson LA, Böttiger LE 1972 Ischaemic heart-disease in relation to fasting values of plasma triglycerides and cholesterol. Stockholm Prospective Study. *Lancet* 1:865–868
  174. Canner PL, Berge KG, Wenger NK, Stamler J, Friedman L, Prineas RJ, Friedewald W 1986 Fifteen year mortality in Coronary Drug Project patients: long-term benefit with niacin. *J Am Coll Cardiol* 8:1245–1255
  175. Brown BG, Hillger L, Zhao XQ, Poulin D, Albers JJ 1995 Types of change in coronary stenosis severity and their relative importance in overall progression and regression of coronary disease. Observations from the FATS Trial. *Familial Atherosclerosis Treatment Study*. *Ann NY Acad Sci* 748:407–417; discussion 417–418
  176. Brown BG, Zhao XQ, Chait A, Fisher LD, Cheung MC, Morse JS, Dowdy AA, Marino EK, Bolson EL, Alaupovic P, Frohlich J, Albers JJ 2001 Simvastatin and niacin, antioxidant vitamins, or the combination for the prevention of coronary disease. *N Engl J Med* 345:1583–1592
  177. Boden WE, Probstfield JL, Anderson T, Chaitman BR, Desvignes-Nickens P, Koprowicz K, McBride R, Teo K, Weintraub W 2011 Niacin in patients with low HDL cholesterol levels receiving intensive statin therapy. *N Engl J Med* 365:2255–2267
  178. Bhardwaj SS, Chalasani N 2007 Lipid-lowering agents that cause drug-induced hepatotoxicity. *Clin Liver Dis* 11:597–613, vii
  179. Musa-Veloso K, Binns MA, Kocenas AC, Poon T, Elliot JA, Rice H, Oppedal-Olsen H, Lloyd H, Lemke S 2010 Long-chain omega-3 fatty acids eicosapentaenoic acid and docosahexaenoic acid dose-dependently reduce fasting serum triglycerides. *Nutr Rev* 68:155–167
  180. Yokoyama M, Origasa H, Matsuzaki M, Matsuzawa Y, Saito Y, Ishikawa Y, Oikawa S, Sasaki J, Hishida H, Itakura H, Kita T, Kitabatake A, Nakaya N, Sakata T, Shimada K, Shirato K 2007 Effects of eicosapentaenoic acid on major coronary events in hypercholesterolaemic patients (JELIS): a randomized open-label, blinded endpoint analysis. *Lancet* 369:1090–1098
  181. Harris WS, Ginsberg HN, Arunakul N, Shachter NS, Windsor SL, Adams M, Berglund L, Osmundsen K 1997 Safety and efficacy of Omacor in severe hypertriglyceridemia. *J Cardiovasc Risk* 4:385–391
  182. Daviglus ML, Stamler J, Orenca AJ, Dyer AR, Liu K, Greenland P, Walsh MK, Morris D, Shekelle RB 1997 Fish consumption and the 30-year risk of fatal myocardial infarction. *N Engl J Med* 336:1046–1053
  183. Hu FB, Bronner L, Willett WC, Stampfer MJ, Rexrode KM, Albert CM, Hunter D, Manson JE 2002 Fish and omega-3 fatty acid intake and risk for coronary heart disease in women. *JAMA* 287:1815–1821
  184. GISSI-Prevenzione Investigators 1999 Dietary supplementation with n-3 polyunsaturated fatty acids and vitamin E after myocardial infarction: results of the GISSI-Prevenzione trial. Gruppo Italiano per lo Studio della Sopravvivenza nell'Infarto miocardico. *Lancet* 354:447–455
  185. Graham DJ, Staffa JA, Shatin D, Andrade SE, Schech SD, La Grenade L, Gurwitz JH, Chan KA, Goodman MJ, Platt R 2004 Incidence of hospitalized rhabdomyolysis in patients treated with lipid-lowering drugs. *JAMA* 292:2585–2590
  186. Sharma M, Ansari MT, Abou-Setta AM, Soares-Weiser K, Ooi TC, Sears M, Yazdi F, Tsertsvadze A, Moher D 2009 Systematic review: comparative effectiveness and harms of combination therapy and monotherapy for dyslipidemia. *Ann Intern Med* 151:622–630
  187. Nakou ES, Filippatos TD, Agouridis AP, Kostara C, Bairaktari ET, Elisaf MS 2010 The effects of ezetimibe and/or orlistat on triglyceride-rich lipoprotein metabolism in obese hypercholesterolemic patients. *Lipids* 45:445–450
  188. Devchand PR 2008 Glitazones and the cardiovascular system. *Curr Opin Endocrinol Diabetes Obes* 15:188–192
  189. Betteridge DJ 2007 Effects of pioglitazone on lipid and lipoprotein metabolism. *Diabetes Obes Metab* 9:640–647
  190. Rizos CV, Elisaf MS, Mikhailidis DP, Liberopoulos EN 2009 How safe is the use of thiazolidinediones in clinical practice? *Expert Opin Drug Saf* 8:15–32
  191. Lewis JD, Ferrara A, Peng T, Hedderston M, Bilker WB, Quesenberry Jr CP, Vaughn DJ, Nessel L, Selby J, Strom BL 2011 Risk of bladder cancer among diabetic patients treated with pioglitazone: interim report of a longitudinal cohort study. *Diabetes Care* 34:916–922
